# Supplementary material for: Pesticide Exposure and Depression among Male Private Pesticide Applicators in the Agricultural Health Study
Source: PubMed Central journal article supplement (PMC4154212; doi:10.1289/ehp.1307450), 2014-06-06
Supplement: ehp.1307450.s001.pdf [file ehp.1307450.s001.pdf]

## Supplemental Material

### **Pesticide Exposure and Depression among Male Private Pesticide Applicators in the Agricultural Health Study**

John D. Beard, David M. Umbach, Jane A. Hoppin, Marie Richards, Michael C.R. Alavanja, Aaron Blair, Dale P. Sandler, and Freya Kamel

| <b>Table of Contents</b>                                                                                                                                                                                                                                    | <b>Page</b> |
|-------------------------------------------------------------------------------------------------------------------------------------------------------------------------------------------------------------------------------------------------------------|-------------|
| <b>Figure S1.</b> Directed acyclic graph to identify potential confounders that needed to be controlled to estimate the total effect of pesticide use on self-reported depression among male private pesticide applicators in the Agricultural Health Study | 3           |
| <b>Methods, statistical analyses</b>                                                                                                                                                                                                                        | 4           |
| Exposure/confounding weights                                                                                                                                                                                                                                | 4           |
| Missing covariate (diabetes and education) data weights                                                                                                                                                                                                     | 4           |
| Missing farmer questionnaire weights (if appropriate)                                                                                                                                                                                                       | 5           |
| Selection/drop out weights                                                                                                                                                                                                                                  | 5           |
| <b>Table S1.</b> More characteristics of male private pesticide applicators in the Agricultural Health Study                                                                                                                                                | 6           |
| <b>Table S2.</b> Summary statistics for the truncated (at the 1st and 99th percentiles) overall stabilized inverse probability weights <sup>a</sup> for models in Table 2                                                                                   | 9           |
| <b>Table S3.</b> Summary statistics for the truncated (at the 1st and 99th percentiles) overall stabilized inverse probability weights <sup>a</sup> for models in Table 3                                                                                   | 10          |
| <b>Table S4.</b> Summary statistics for the truncated (at the 1st and 99th percentiles) overall stabilized inverse probability weights <sup>a</sup> for models in Table S5                                                                                  | 13          |

|                                                                                                                                                                                                                                                                                             |    |
|---------------------------------------------------------------------------------------------------------------------------------------------------------------------------------------------------------------------------------------------------------------------------------------------|----|
| <b>Table S5.</b> Cumulative lifetime days of use of individual pesticides and self-reported depression among male private pesticide applicators in the Agricultural Health Study                                                                                                            | 19 |
| <b>Table S6.</b> Pesticide use and self-reported depression among male private pesticide applicators in the Agricultural Health Study without weighting for potential biases from missing covariate data, missing farmer questionnaire, or drop out                                         | 32 |
| <b>Table S7.</b> Ever-use of pesticide classes and specific pesticides and self-reported depression among male private pesticide applicators in the Agricultural Health Study without weighting for potential biases from missing covariate data, missing farmer questionnaire, or drop out | 33 |
| <b>References</b>                                                                                                                                                                                                                                                                           | 35 |

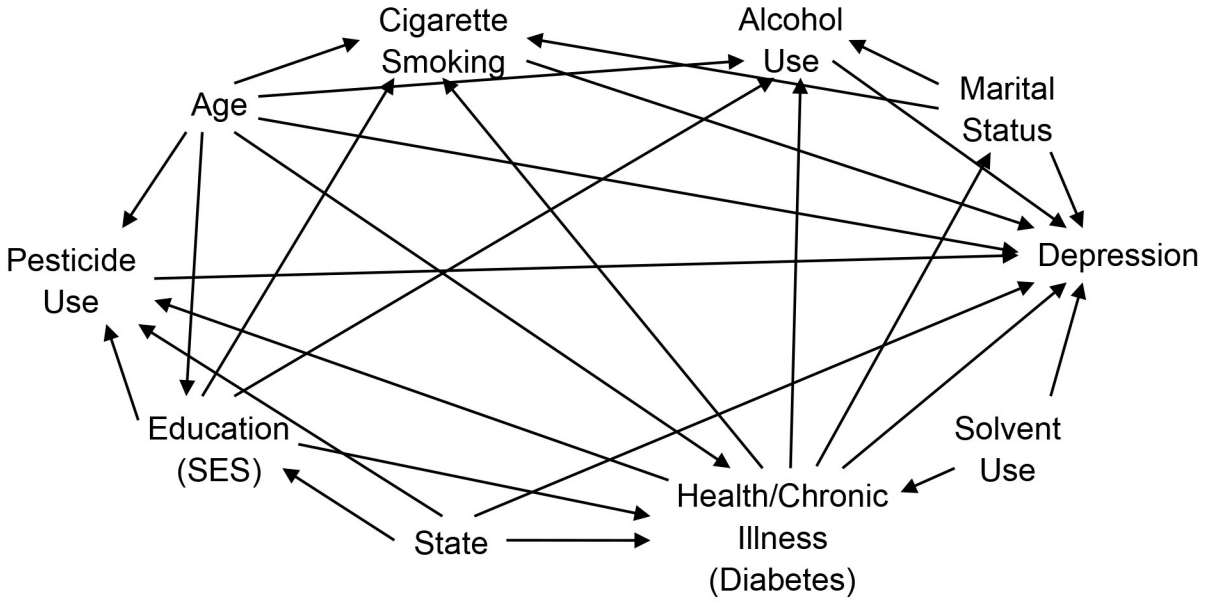

**Figure S1.** Directed acyclic graph to identify potential confounders that needed to be controlled to estimate the total effect of pesticide use on self-reported depression among male private pesticide applicators in the Agricultural Health Study. Note that switching the direction of the arrows from “Health/Chronic Illness (Diabetes)” to “Cigarette Smoking”, from “Health/Chronic Illness (Diabetes)” to “Alcohol Use”, and from “Health/Chronic Illness (Diabetes)” to “Marital Status” or adding an arrow from “Age” to “Marital Status” all result in the same two minimally sufficient adjustment sets as the directed acyclic graph shown here.

## **Methods, statistical analyses**

We used standard formulas (Muller and Fetterman 2002; Stokes et al. 2000) to estimate linear, logistic, or ordinal logistic regression models to calculate the various stabilized weights (Hernán et al. 2000; Robins et al. 2000). In all models, the quantities of interest were the predicted probabilities of exposure, not missing covariate data, completing the farmer questionnaire, or not dropping out of the cohort. The populations to which the weights applied, types of models used, outcome of each model, and covariates included in each model were as follows:

### ***Exposure/confounding weights***

Population: 45,827 male applicators not missing data on depression at enrollment and at follow-up and not missing covariate data (for analyses involving information from the farmer questionnaire, this number was 20,471)

Model type: linear, logistic, or ordinal logistic (depending on the nature of the exposure variable)

Outcome: exposure (continuous, dichotomous, or ordered categories)

Covariates in models used to estimate numerators: intercept only

Covariates in models used to estimate denominators: age, diabetes, education, state

### ***Missing covariate (diabetes and education) data weights***

Population: 49,142 male applicators not missing data on depression at enrollment and at follow-up (for analyses involving information from the farmer questionnaire, this numbers was 22,300)

Model type: logistic

Outcome: not missing covariate data (dichotomous)

Covariates in models used to estimate numerators: exposure

Covariates in models used to estimate denominators: age, state, exposure, age\*exposure, state\*exposure

***Missing farmer questionnaire weights (if appropriate)***

Population: 45,827 male applicators not missing data on depression at enrollment and at follow-up and not missing covariate data

Model type: logistic

Outcome: completed farmer questionnaire (dichotomous)

Covariates in models used to estimate numerators: intercept only

Covariates in models used to estimate denominators: age, diabetes, education, state

***Selection/drop out weights***

Population: 45,827 male applicators not missing data on depression at enrollment and at follow-up and not missing covariate data (for analyses involving information from the farmer questionnaire, this number was 20,471)

Model type: logistic

Outcome: did not drop out of cohort (dichotomous)

Covariates in models used to estimate numerators: exposure

Covariates in models used to estimate denominators: age, diabetes, education, state, exposure, age\*exposure, diabetes\*exposure, education\*exposure, state\*exposure

For more detailed information on inverse probability weighting, see Cole and Hernán (2008), Hernán et al. (2000, 2004), Hernán and Robins (2006), Robins (1998), Robins et al. (2000), and Sato and Matsuyama (2003).

**Table S1.** More characteristics of male private pesticide applicators in the Agricultural Health Study.

| Characteristic                                                                                         | Non-cases<br>[n (%)] | PRE-E <sup>a</sup><br>Cases<br>[n (%)] | PRE-E <sup>a</sup><br>Adjusted OR <sup>b</sup><br>(95% CI) | PRE-B <sup>a</sup><br>Cases<br>[n (%)] | PRE-B <sup>a</sup><br>Adjusted OR <sup>b</sup><br>(95% CI) | POST <sup>a</sup><br>Cases<br>[n (%)] | POST <sup>a</sup><br>Adjusted OR <sup>b</sup><br>(95% CI) | p for difference<br>among ORs <sup>c</sup> |
|--------------------------------------------------------------------------------------------------------|----------------------|----------------------------------------|------------------------------------------------------------|----------------------------------------|------------------------------------------------------------|---------------------------------------|-----------------------------------------------------------|--------------------------------------------|
| <b>Total</b>                                                                                           | 19,506 (100)         | 474 (100)                              |                                                            | 540 (100)                              |                                                            | 688 (100)                             |                                                           |                                            |
| <b>Marital status</b>                                                                                  |                      |                                        |                                                            |                                        |                                                            |                                       |                                                           |                                            |
| Married or living as married                                                                           | 17,121 (88)          | 402 (85)                               | Reference                                                  | 453 (84)                               | Reference                                                  | 620 (90)                              | Reference                                                 |                                            |
| Divorced, separated, or widowed                                                                        | 688 (4)              | 39 (8)                                 | 2.5 (1.8, 3.5)                                             | 47 (9)                                 | 2.7 (2.0, 3.6)                                             | 22 (3)                                | 0.9 (0.6, 1.3)                                            |                                            |
| Never married                                                                                          | 1,676 (9)            | 33 (7)                                 | 1.3 (0.9, 2.0)                                             | 38 (7)                                 | 1.3 (0.9, 1.9)                                             | 46 (7)                                | 0.7 (0.5, 1.0)                                            | < 0.01                                     |
| Missing                                                                                                | 21                   | 0                                      |                                                            | 2                                      |                                                            | 0                                     |                                                           |                                            |
| <b>Number of children in family</b>                                                                    |                      |                                        |                                                            |                                        |                                                            |                                       |                                                           |                                            |
| 0                                                                                                      | 2,787 (14)           | 53 (11)                                | Reference                                                  | 67 (12)                                | Reference                                                  | 86 (13)                               | Reference                                                 |                                            |
| 1-3                                                                                                    | 12,659 (65)          | 309 (66)                               | 0.9 (0.7, 1.2)                                             | 364 (68)                               | 0.8 (0.6, 1.1)                                             | 478 (70)                              | 1.2 (1.0, 1.6)                                            |                                            |
| 4-5                                                                                                    | 3,248 (17)           | 88 (19)                                | 0.9 (0.6, 1.3)                                             | 83 (15)                                | 0.7 (0.5, 0.9)                                             | 106 (15)                              | 1.2 (0.9, 1.6)                                            |                                            |
| ≥ 5                                                                                                    | 702 (4)              | 18 (4)                                 | 0.8 (0.4, 1.4)                                             | 23 (4)                                 | 0.8 (0.5, 1.4)                                             | 17 (2)                                | 1.0 (0.6, 1.7)                                            | 0.26                                       |
| Missing                                                                                                | 110                  | 6                                      |                                                            | 3                                      |                                                            | 1                                     |                                                           |                                            |
| <b>Frequency of alcohol consumption during past year (times a week)</b>                                |                      |                                        |                                                            |                                        |                                                            |                                       |                                                           |                                            |
| Never                                                                                                  | 6,448 (33)           | 172 (36)                               | Reference                                                  | 189 (35)                               | Reference                                                  | 219 (32)                              | Reference                                                 |                                            |
| < 1                                                                                                    | 6,628 (34)           | 162 (34)                               | 1.0 (0.8, 1.2)                                             | 194 (36)                               | 1.0 (0.8, 1.3)                                             | 245 (36)                              | 1.1 (0.9, 1.3)                                            |                                            |
| 1-4                                                                                                    | 5,281 (27)           | 105 (22)                               | 0.8 (0.6, 1.1)                                             | 132 (25)                               | 0.9 (0.7, 1.1)                                             | 171 (25)                              | 0.9 (0.7, 1.1)                                            |                                            |
| > 4                                                                                                    | 1,073 (6)            | 34 (7)                                 | 1.2 (0.8, 1.8)                                             | 22 (4)                                 | 0.7 (0.4, 1.1)                                             | 45 (7)                                | 1.2 (0.9, 1.7)                                            | 0.45                                       |
| Missing                                                                                                | 76                   | 1                                      |                                                            | 3                                      |                                                            | 8                                     |                                                           |                                            |
| <b>Cigarette smoking status</b>                                                                        |                      |                                        |                                                            |                                        |                                                            |                                       |                                                           |                                            |
| Never                                                                                                  | 11,155 (57)          | 230 (49)                               | Reference                                                  | 268 (50)                               | Reference                                                  | 336 (49)                              | Reference                                                 |                                            |
| Past                                                                                                   | 5,935 (31)           | 175 (37)                               | 1.2 (1.0, 1.5)                                             | 201 (37)                               | 1.3 (1.0, 1.5)                                             | 236 (35)                              | 1.5 (1.2, 1.7)                                            |                                            |
| Current                                                                                                | 2,342 (12)           | 66 (14)                                | 1.3 (1.0, 1.8)                                             | 69 (13)                                | 1.2 (0.9, 1.6)                                             | 112 (16)                              | 1.6 (1.2, 1.9)                                            | 0.50                                       |
| Missing                                                                                                | 74                   | 3                                      |                                                            | 2                                      |                                                            | 4                                     |                                                           |                                            |
| <b>Times visited medical doctor or medical assistant about health concern in past year<sup>d</sup></b> |                      |                                        |                                                            |                                        |                                                            |                                       |                                                           |                                            |
| 0                                                                                                      | 3,887 (36)           | 49 (16)                                | Reference                                                  | 43 (14)                                | Reference                                                  | 90 (24)                               | Reference                                                 |                                            |
| 1                                                                                                      | 3,556 (33)           | 72 (24)                                | 1.6 (1.1, 2.3)                                             | 75 (24)                                | 1.9 (1.3, 2.8)                                             | 125 (34)                              | 1.6 (1.2, 2.1)                                            |                                            |
| > 1                                                                                                    | 3,417 (31)           | 183 (60)                               | 4.1 (3.0, 5.7)                                             | 189 (62)                               | 5.3 (3.8, 7.5)                                             | 154 (42)                              | 2.2 (1.7, 2.9)                                            | < 0.01                                     |
| Missing                                                                                                | 130                  | 2                                      |                                                            | 8                                      |                                                            | 2                                     |                                                           |                                            |

| Characteristic                                                                            | Non-cases<br>[n (%)] | PRE-E <sup>a</sup><br>Cases<br>[n (%)] | PRE-E <sup>a</sup><br>Adjusted OR <sup>b</sup><br>(95% CI) | PRE-B <sup>a</sup><br>Cases<br>[n (%)] | PRE-B <sup>a</sup><br>Adjusted OR <sup>b</sup><br>(95% CI) | POST <sup>a</sup><br>Cases<br>[n (%)] | POST <sup>a</sup><br>Adjusted OR <sup>b</sup><br>(95% CI) | p for difference<br>among ORs <sup>c</sup> |
|-------------------------------------------------------------------------------------------|----------------------|----------------------------------------|------------------------------------------------------------|----------------------------------------|------------------------------------------------------------|---------------------------------------|-----------------------------------------------------------|--------------------------------------------|
| <b>Years lived or worked on farm over lifetime<sup>d</sup></b>                            |                      |                                        |                                                            |                                        |                                                            |                                       |                                                           |                                            |
| < 21                                                                                      | 967 (9)              | 17 (6)                                 | 0.8 (0.5, 1.3)                                             | 27 (9)                                 | 1.3 (0.8, 2.0)                                             | 41 (11)                               | 1.4 (0.9, 1.9)                                            |                                            |
| 21-30                                                                                     | 1,387 (13)           | 29 (10)                                | 1.0 (0.6, 1.4)                                             | 39 (13)                                | 1.3 (1.0, 1.8)                                             | 58 (16)                               | 1.4 (1.0, 1.9)                                            |                                            |
| > 30                                                                                      | 8,466 (78)           | 258 (85)                               | Reference                                                  | 243 (79)                               | Reference                                                  | 265 (73)                              | Reference                                                 | 0.32                                       |
| Missing                                                                                   | 170                  | 2                                      |                                                            | 6                                      |                                                            | 7                                     |                                                           |                                            |
| <b>Size of farm worked last year (acres)</b>                                              |                      |                                        |                                                            |                                        |                                                            |                                       |                                                           |                                            |
| Didn't work on a farm or none                                                             | 591 (3)              | 16 (3)                                 | Reference                                                  | 21 (4)                                 | Reference                                                  | 22 (3)                                | Reference                                                 |                                            |
| < 50                                                                                      | 2,415 (13)           | 72 (16)                                | 1.1 (0.7, 2.0)                                             | 77 (15)                                | 0.9 (0.6, 1.5)                                             | 81 (13)                               | 0.8 (0.5, 1.4)                                            |                                            |
| 50-499                                                                                    | 8,949 (48)           | 228 (50)                               | 0.9 (0.5, 1.6)                                             | 260 (50)                               | 0.7 (0.4, 1.2)                                             | 301 (47)                              | 0.9 (0.6, 1.4)                                            |                                            |
| > 499                                                                                     | 6,781 (36)           | 144 (31)                               | 0.8 (0.5, 1.4)                                             | 163 (31)                               | 0.6 (0.4, 1.0)                                             | 238 (37)                              | 0.9 (0.6, 1.5)                                            | 0.26                                       |
| Missing                                                                                   | 770                  | 14                                     |                                                            | 19                                     |                                                            | 46                                    |                                                           |                                            |
| <b>Wear chemical resistant gloves when personally handle pesticides</b>                   |                      |                                        |                                                            |                                        |                                                            |                                       |                                                           |                                            |
| No                                                                                        | 5,156 (26)           | 129 (27)                               | Reference                                                  | 147 (27)                               | Reference                                                  | 198 (29)                              | Reference                                                 |                                            |
| Yes                                                                                       | 14,350 (74)          | 345 (73)                               | 1.0 (0.8, 1.2)                                             | 393 (73)                               | 0.9 (0.8, 1.1)                                             | 490 (71)                              | 0.9 (0.7, 1.0)                                            | 0.68                                       |
| <b>Ever have job off farm<sup>d</sup></b>                                                 |                      |                                        |                                                            |                                        |                                                            |                                       |                                                           |                                            |
| No                                                                                        | 3,725 (34)           | 91 (30)                                | Reference                                                  | 100 (32)                               | Reference                                                  | 110 (30)                              | Reference                                                 |                                            |
| Yes                                                                                       | 7,151 (66)           | 215 (70)                               | 1.2 (1.0, 1.6)                                             | 211 (68)                               | 1.1 (0.9, 1.4)                                             | 259 (70)                              | 1.2 (0.9, 1.5)                                            | 0.83                                       |
| Missing                                                                                   | 114                  | 0                                      |                                                            | 4                                      |                                                            | 2                                     |                                                           |                                            |
| <b>Exposed to solvents (other than gasoline) at longest held non-farm job<sup>d</sup></b> |                      |                                        |                                                            |                                        |                                                            |                                       |                                                           |                                            |
| No                                                                                        | 8,961 (82)           | 235 (77)                               | Reference                                                  | 247 (79)                               | Reference                                                  | 311 (84)                              | Reference                                                 |                                            |
| Yes                                                                                       | 1,915 (18)           | 71 (23)                                | 1.5 (1.1, 1.9)                                             | 64 (21)                                | 1.2 (0.9, 1.6)                                             | 58 (16)                               | 0.8 (0.6, 1.1)                                            | 0.01                                       |
| Missing                                                                                   | 114                  | 0                                      |                                                            | 4                                      |                                                            | 2                                     |                                                           |                                            |

Abbreviations: CI, confidence interval; OR, odds ratio; POST, post-enrollment; PRE-B, pre-enrollment both; PRE-E, pre-enrollment enrollment only.

<sup>a</sup>Cases divided into three groups based on when the physician-diagnosis of depression occurred (before or after enrollment) and on when it was reported via the AHS contacts (at enrollment, at follow-up, or both). The PRE-E group included applicators who reported a previous diagnosis of

depression at enrollment, but who did not confirm their pre-enrollment diagnosis at follow-up. The PRE-B group included applicators who reported a previous diagnosis of depression at both enrollment and follow-up, or who reported a previous diagnosis at follow-up only but with an age at diagnosis less than their age at enrollment. The POST group included applicators who reported a previous diagnosis of depression at follow-up but not enrollment, and whose reported age at diagnosis equaled or exceeded their age at enrollment. <sup>b</sup>Adjusted for age at enrollment (modeled with a cubic polynomial) and state of residence. <sup>c</sup>Differences among case-group-specific ORs tested via Wald  $\chi^2$  tests. <sup>d</sup>Data available only for 11,982 applicators who completed the farmer questionnaire.



**Table S2.** Summary statistics for the truncated (at the 1st and 99th percentiles) overall stabilized inverse probability weights<sup>a</sup> for models in Table 2.

| <b>Variable</b>                                                                         | <b>Mean</b> | <b>Standard Deviation</b> | <b>1st Percentile</b> | <b>5th Percentile</b> | <b>Median</b> | <b>95th Percentile</b> | <b>99th Percentile</b> |
|-----------------------------------------------------------------------------------------|-------------|---------------------------|-----------------------|-----------------------|---------------|------------------------|------------------------|
| Cumulative lifetime days personally mixed or applied pesticides                         |             |                           |                       |                       |               |                        |                        |
| Categorical <sup>b</sup>                                                                | 1.05        | 0.32                      | 0.58                  | 0.67                  | 0.97          | 1.68                   | 2.27                   |
| Trend <sup>c</sup>                                                                      | 1.00        | 0.23                      | 0.67                  | 0.73                  | 0.95          | 1.46                   | 1.81                   |
| Ever diagnosed with pesticide poisoning <sup>d</sup>                                    | 0.99        | 0.34                      | 0.52                  | 0.57                  | 0.95          | 1.61                   | 2.42                   |
| Ever experienced an incident of unusually high personal pesticide exposure <sup>d</sup> | 1.05        | 0.32                      | 0.58                  | 0.67                  | 0.97          | 1.68                   | 2.27                   |

<sup>a</sup>Weights adjusted for age at enrollment (modeled with a restricted, quadratic spline with knots at ages 40, 48, and 57 years based on percentiles of the age distribution in cases), ever diagnosed with diabetes, education level, state of residence, not missing covariate data (conditional on age, state, the exposure, and pairwise interaction terms between each covariate and the exposure), and not dropping out of the AHS cohort (conditional on age, diabetes, education, state, the exposure, and pairwise interaction terms between each covariate and the exposure).

<sup>b</sup>Category boundaries set at quartiles of cumulative lifetime days of pesticide use among all male private pesticide applicators. <sup>c</sup>Used within-category medians. <sup>d</sup>Data available only for 11,982 applicators who completed the farmer questionnaire. Weights additionally adjusted for completing the farmer questionnaire (conditional on age, diabetes, education, and state).

**Table S3.** Summary statistics for the truncated (at the 1st and 99th percentiles) overall stabilized inverse probability weights<sup>a</sup> for models in Table 3.

| <b>Ever personally mixed or applied</b>           | <b>Mean</b> | <b>Standard deviation</b> | <b>1st Percentile</b> | <b>5th Percentile</b> | <b>Median</b> | <b>95th Percentile</b> | <b>99th Percentile</b> |
|---------------------------------------------------|-------------|---------------------------|-----------------------|-----------------------|---------------|------------------------|------------------------|
| <b><i>Fumigants</i></b>                           | 0.99        | 0.50                      | 0.34                  | 0.42                  | 0.81          | 2.00                   | 2.70                   |
| Aluminum phosphide                                | 0.99        | 0.21                      | 0.60                  | 0.75                  | 0.96          | 1.41                   | 1.75                   |
| Carbon tetrachloride/carbon disulfide (80/20 mix) | 0.99        | 0.23                      | 0.33                  | 0.73                  | 0.95          | 1.41                   | 1.91                   |
| Ethylene dibromide                                | 0.99        | 0.23                      | 0.44                  | 0.73                  | 0.95          | 1.46                   | 1.84                   |
| Methyl bromide                                    | 0.98        | 0.70                      | 0.27                  | 0.31                  | 0.79          | 2.06                   | 5.70                   |
| <b><i>Fungicides</i></b>                          | 1.00        | 0.59                      | 0.41                  | 0.48                  | 0.77          | 2.48                   | 2.87                   |
| Benomyl <sup>b</sup>                              | 0.99        | 0.41                      | 0.25                  | 0.42                  | 0.88          | 1.63                   | 3.28                   |
| Captan                                            | 0.99        | 0.22                      | 0.56                  | 0.72                  | 0.96          | 1.43                   | 1.85                   |
| Chlorothalonil                                    | 0.98        | 0.35                      | 0.30                  | 0.51                  | 0.90          | 1.63                   | 2.57                   |
| Maneb/mancozeb                                    | 0.98        | 0.41                      | 0.24                  | 0.36                  | 0.88          | 1.63                   | 3.07                   |
| Metalaxyl                                         | 0.99        | 0.54                      | 0.35                  | 0.41                  | 0.79          | 2.18                   | 2.75                   |
| Ziram                                             | 1.00        | 0.21                      | 0.66                  | 0.74                  | 0.95          | 1.42                   | 1.73                   |
| <b><i>Herbicides</i></b>                          | 0.99        | 0.24                      | 0.64                  | 0.72                  | 0.94          | 1.47                   | 1.90                   |
| Alachlor                                          | 0.99        | 0.28                      | 0.62                  | 0.64                  | 0.96          | 1.52                   | 2.28                   |
| Butylate                                          | 0.98        | 0.30                      | 0.53                  | 0.57                  | 0.97          | 1.44                   | 2.60                   |
| Chlorimuron-ethyl                                 | 0.99        | 0.28                      | 0.61                  | 0.66                  | 0.92          | 1.54                   | 2.18                   |
| Dicamba                                           | 0.98        | 0.69                      | 0.47                  | 0.51                  | 0.73          | 2.06                   | 4.82                   |
| EPTC                                              | 0.98        | 0.38                      | 0.51                  | 0.55                  | 0.94          | 1.33                   | 3.60                   |
| Glyphosate                                        | 0.99        | 0.32                      | 0.59                  | 0.62                  | 0.93          | 1.63                   | 2.40                   |
| Imazethapyr                                       | 0.98        | 0.79                      | 0.48                  | 0.55                  | 0.76          | 1.72                   | 6.17                   |
| Metolachlor                                       | 0.99        | 0.35                      | 0.61                  | 0.62                  | 0.91          | 1.63                   | 2.59                   |
| Paraquat                                          | 0.99        | 0.43                      | 0.36                  | 0.47                  | 0.85          | 1.85                   | 2.38                   |
| Pendimethalin                                     | 1.00        | 0.22                      | 0.63                  | 0.73                  | 0.96          | 1.44                   | 1.79                   |
| Petroleum oil                                     | 0.99        | 0.28                      | 0.62                  | 0.63                  | 0.96          | 1.47                   | 2.34                   |
| Trifluralin                                       | 0.99        | 0.43                      | 0.56                  | 0.58                  | 0.85          | 1.80                   | 3.08                   |
| <b><i>Phenoxy herbicides</i></b>                  | 0.99        | 0.34                      | 0.58                  | 0.61                  | 0.90          | 1.70                   | 2.34                   |
| 2,4-D                                             | 0.99        | 0.36                      | 0.56                  | 0.60                  | 0.88          | 1.75                   | 2.44                   |
| 2,4,5-T                                           | 0.98        | 0.35                      | 0.39                  | 0.55                  | 0.92          | 1.58                   | 2.86                   |
| 2,4,5-TP                                          | 0.99        | 0.23                      | 0.44                  | 0.72                  | 0.95          | 1.41                   | 1.94                   |

| <b>Ever personally mixed or applied</b>    | <b>Mean</b> | <b>Standard deviation</b> | <b>1st Percentile</b> | <b>5th Percentile</b> | <b>Median</b> | <b>95th Percentile</b> | <b>99th Percentile</b> |
|--------------------------------------------|-------------|---------------------------|-----------------------|-----------------------|---------------|------------------------|------------------------|
| <i>Triazine herbicides</i>                 | 0.99        | 0.40                      | 0.45                  | 0.58                  | 0.85          | 1.85                   | 2.45                   |
| Atrazine                                   | 0.99        | 0.37                      | 0.47                  | 0.64                  | 0.86          | 1.71                   | 2.46                   |
| Cyanazine                                  | 0.98        | 0.59                      | 0.51                  | 0.55                  | 0.80          | 1.52                   | 4.33                   |
| Metribuzin                                 | 0.98        | 0.45                      | 0.54                  | 0.55                  | 0.86          | 1.68                   | 3.31                   |
| <b><i>Insecticides</i></b>                 | 1.00        | 0.24                      | 0.63                  | 0.72                  | 0.94          | 1.48                   | 1.90                   |
| <b><i>Carbamates<sup>b</sup></i></b>       | 1.00        | 0.56                      | 0.57                  | 0.62                  | 0.82          | 1.99                   | 4.05                   |
| Aldicarb                                   | 0.99        | 0.46                      | 0.29                  | 0.40                  | 0.88          | 1.77                   | 3.38                   |
| Carbaryl                                   | 0.99        | 0.56                      | 0.52                  | 0.59                  | 0.76          | 2.28                   | 3.58                   |
| Carbofuran                                 | 0.99        | 0.26                      | 0.57                  | 0.65                  | 0.93          | 1.47                   | 2.18                   |
| <b><i>Organochlorine insecticides</i></b>  | 0.98        | 0.61                      | 0.50                  | 0.54                  | 0.73          | 2.24                   | 4.00                   |
| Aldrin                                     | 0.95        | 0.42                      | 0.31                  | 0.39                  | 0.90          | 1.58                   | 3.33                   |
| Chlordane                                  | 0.98        | 0.43                      | 0.37                  | 0.48                  | 0.85          | 1.80                   | 3.12                   |
| DDT                                        | 0.96        | 0.67                      | 0.33                  | 0.38                  | 0.79          | 2.16                   | 4.77                   |
| Dieldrin                                   | 0.97        | 0.26                      | 0.25                  | 0.52                  | 0.95          | 1.40                   | 2.04                   |
| Heptachlor                                 | 0.95        | 0.37                      | 0.28                  | 0.37                  | 0.91          | 1.54                   | 2.75                   |
| Lindane                                    | 0.99        | 0.26                      | 0.48                  | 0.57                  | 0.94          | 1.40                   | 2.37                   |
| Toxaphene                                  | 0.98        | 0.32                      | 0.36                  | 0.51                  | 0.91          | 1.55                   | 2.43                   |
| <b><i>Organophosphate insecticides</i></b> | 0.99        | 0.27                      | 0.58                  | 0.70                  | 0.92          | 1.55                   | 2.03                   |
| Chlorpyrifos                               | 0.99        | 0.23                      | 0.67                  | 0.69                  | 0.95          | 1.44                   | 1.95                   |
| Coumaphos                                  | 0.99        | 0.22                      | 0.59                  | 0.75                  | 0.95          | 1.42                   | 1.82                   |
| Diazinon                                   | 1.00        | 0.39                      | 0.44                  | 0.55                  | 0.85          | 1.74                   | 2.41                   |
| Dichlorvos                                 | 0.98        | 0.24                      | 0.42                  | 0.64                  | 0.94          | 1.37                   | 2.12                   |
| Fonofos                                    | 0.98        | 0.43                      | 0.51                  | 0.56                  | 0.96          | 1.32                   | 4.05                   |
| Malathion                                  | 0.99        | 0.28                      | 0.60                  | 0.67                  | 0.91          | 1.58                   | 2.13                   |
| Parathion                                  | 0.99        | 0.34                      | 0.34                  | 0.54                  | 0.90          | 1.62                   | 2.40                   |
| Phorate                                    | 0.99        | 0.43                      | 0.52                  | 0.58                  | 0.97          | 1.48                   | 3.59                   |
| Terbufos                                   | 0.99        | 0.38                      | 0.59                  | 0.61                  | 0.93          | 1.68                   | 2.90                   |
| Trichlorfon                                | 1.00        | 0.21                      | 0.66                  | 0.74                  | 0.95          | 1.43                   | 1.78                   |
| <b><i>Pyrethroid insecticides</i></b>      | 0.99        | 0.27                      | 0.55                  | 0.60                  | 0.95          | 1.44                   | 2.24                   |
| Permethrin (for animals)                   | 0.98        | 0.28                      | 0.44                  | 0.54                  | 0.95          | 1.37                   | 2.47                   |
| Permethrin (for crops)                     | 0.99        | 0.24                      | 0.58                  | 0.70                  | 0.95          | 1.47                   | 1.86                   |

Abbreviations: 2,4-D, (2,4-dichlorophenoxy)acetic acid; 2,4,5-T, (2,4,5-trichlorophenoxy)acetic acid; 2,4,5-TP, (*RS*)-2-(2,4,5-trichlorophenoxy)propionic acid; DDT, 1,1,1-trichloro-2,2-bis(4-chlorophenyl)ethane; EPTC, *S*-ethyl dipropyl(thiocarbamate).

<sup>a</sup>Weights adjusted for age at enrollment (modeled with a restricted, quadratic spline with knots at ages 40, 48, and 57 years based on percentiles of the age distribution in cases), ever diagnosed with diabetes, education level, state of residence, not missing covariate data (conditional on age, state, the exposure, and pairwise interaction terms between each covariate and the exposure), and not dropping out of the AHS cohort (conditional on age, diabetes, education, state, the exposure, and pairwise interaction terms between each covariate and the exposure). <sup>b</sup>Benomyl is also included in carbamates.

**Table S4.** Summary statistics for the truncated (at the 1st and 99th percentiles) overall stabilized inverse probability weights<sup>a</sup> for models in Table S5.

| <b>Cumulative lifetime days personally mixed or applied<sup>b,c</sup></b> | <b>Mean</b> | <b>Standard deviation</b> | <b>1st Percentile</b> | <b>5th Percentile</b> | <b>Median</b> | <b>95th Percentile</b> | <b>99th Percentile</b> |
|---------------------------------------------------------------------------|-------------|---------------------------|-----------------------|-----------------------|---------------|------------------------|------------------------|
| <b><i>Fumigants</i></b>                                                   |             |                           |                       |                       |               |                        |                        |
| Aluminum phosphide <sup>d</sup>                                           |             |                           |                       |                       |               |                        |                        |
| Categorical <sup>e</sup>                                                  | 0.99        | 0.31                      | 0.53                  | 0.63                  | 0.93          | 1.63                   | 2.12                   |
| Trend <sup>f</sup>                                                        | 1.00        | 0.31                      | 0.56                  | 0.64                  | 0.92          | 1.64                   | 2.11                   |
| Carbon tetrachloride/carbon disulfide (80/20 mix) <sup>d</sup>            |             |                           |                       |                       |               |                        |                        |
| Categorical                                                               | 0.99        | 0.31                      | 0.35                  | 0.65                  | 0.92          | 1.61                   | 2.13                   |
| Trend <sup>f</sup>                                                        | 1.00        | 0.31                      | 0.57                  | 0.64                  | 0.93          | 1.63                   | 2.12                   |
| Ethylene dibromide <sup>d</sup>                                           |             |                           |                       |                       |               |                        |                        |
| Categorical <sup>e</sup>                                                  | 1.00        | 0.35                      | 0.50                  | 0.62                  | 0.92          | 1.72                   | 2.35                   |
| Trend <sup>f</sup>                                                        | 1.00        | 0.31                      | 0.56                  | 0.64                  | 0.92          | 1.62                   | 2.13                   |
| Methyl bromide                                                            |             |                           |                       |                       |               |                        |                        |
| Categorical                                                               | 1.02        | 0.44                      | 0.27                  | 0.63                  | 0.89          | 1.82                   | 3.41                   |
| Trend <sup>f</sup>                                                        | 1.00        | 0.21                      | 0.67                  | 0.74                  | 0.95          | 1.43                   | 1.76                   |
| <b><i>Fungicides</i></b>                                                  |             |                           |                       |                       |               |                        |                        |
| Benomyl <sup>d,g</sup>                                                    |             |                           |                       |                       |               |                        |                        |
| Categorical <sup>e</sup>                                                  | 1.00        | 0.39                      | 0.28                  | 0.60                  | 0.90          | 1.79                   | 2.48                   |
| Trend <sup>f</sup>                                                        | 1.00        | 0.31                      | 0.55                  | 0.64                  | 0.92          | 1.63                   | 2.12                   |
| Captan                                                                    |             |                           |                       |                       |               |                        |                        |
| Categorical                                                               | 1.00        | 0.22                      | 0.58                  | 0.73                  | 0.96          | 1.41                   | 1.81                   |
| Trend <sup>f</sup>                                                        | 1.00        | 0.21                      | 0.67                  | 0.74                  | 0.95          | 1.42                   | 1.75                   |
| Chlorothalonil                                                            |             |                           |                       |                       |               |                        |                        |
| Categorical                                                               | 1.00        | 0.28                      | 0.44                  | 0.70                  | 0.94          | 1.56                   | 2.16                   |
| Trend <sup>f</sup>                                                        | 1.00        | 0.21                      | 0.67                  | 0.74                  | 0.95          | 1.42                   | 1.75                   |
| Maneb/mancozeb <sup>d</sup>                                               |             |                           |                       |                       |               |                        |                        |
| Categorical                                                               | 1.00        | 0.38                      | 0.28                  | 0.60                  | 0.90          | 1.77                   | 2.42                   |
| Trend <sup>f</sup>                                                        | 1.00        | 0.31                      | 0.57                  | 0.64                  | 0.92          | 1.62                   | 2.12                   |

| <b>Cumulative lifetime days personally mixed or applied<sup>b,c</sup></b> | <b>Mean</b> | <b>Standard deviation</b> | <b>1st Percentile</b> | <b>5th Percentile</b> | <b>Median</b> | <b>95th Percentile</b> | <b>99th Percentile</b> |
|---------------------------------------------------------------------------|-------------|---------------------------|-----------------------|-----------------------|---------------|------------------------|------------------------|
| Metalaxyl <sup>d</sup>                                                    |             |                           |                       |                       |               |                        |                        |
| Categorical                                                               | 1.08        | 0.58                      | 0.34                  | 0.55                  | 0.90          | 2.38                   | 3.41                   |
| Trend <sup>f</sup>                                                        | 0.99        | 0.29                      | 0.56                  | 0.65                  | 0.93          | 1.59                   | 2.09                   |
| <b>Herbicides</b>                                                         |             |                           |                       |                       |               |                        |                        |
| Alachlor                                                                  |             |                           |                       |                       |               |                        |                        |
| Categorical                                                               | 1.00        | 0.23                      | 0.60                  | 0.67                  | 0.96          | 1.42                   | 2.01                   |
| Trend <sup>f</sup>                                                        | 1.00        | 0.22                      | 0.68                  | 0.74                  | 0.95          | 1.44                   | 1.75                   |
| Butylate <sup>d</sup>                                                     |             |                           |                       |                       |               |                        |                        |
| Categorical                                                               | 0.99        | 0.29                      | 0.44                  | 0.64                  | 0.97          | 1.53                   | 2.19                   |
| Trend <sup>f</sup>                                                        | 1.00        | 0.31                      | 0.57                  | 0.64                  | 0.93          | 1.63                   | 2.12                   |
| Chlorimuron-ethyl <sup>d</sup>                                            |             |                           |                       |                       |               |                        |                        |
| Categorical                                                               | 0.99        | 0.33                      | 0.56                  | 0.63                  | 0.92          | 1.68                   | 2.24                   |
| Trend <sup>f</sup>                                                        | 1.00        | 0.31                      | 0.57                  | 0.64                  | 0.92          | 1.63                   | 2.10                   |
| Dicamba                                                                   |             |                           |                       |                       |               |                        |                        |
| Categorical                                                               | 1.07        | 0.61                      | 0.48                  | 0.53                  | 0.99          | 1.64                   | 5.07                   |
| Trend <sup>f</sup>                                                        | 1.00        | 0.21                      | 0.69                  | 0.74                  | 0.96          | 1.41                   | 1.75                   |
| EPTC                                                                      |             |                           |                       |                       |               |                        |                        |
| Categorical                                                               | 0.98        | 0.22                      | 0.51                  | 0.68                  | 0.96          | 1.35                   | 1.96                   |
| Trend <sup>f</sup>                                                        | 1.00        | 0.21                      | 0.67                  | 0.74                  | 0.95          | 1.42                   | 1.75                   |
| Glyphosate                                                                |             |                           |                       |                       |               |                        |                        |
| Categorical                                                               | 1.05        | 0.36                      | 0.57                  | 0.66                  | 0.95          | 1.80                   | 2.38                   |
| Trend <sup>f</sup>                                                        | 1.00        | 0.22                      | 0.67                  | 0.74                  | 0.95          | 1.44                   | 1.77                   |
| Imazethapyr                                                               |             |                           |                       |                       |               |                        |                        |
| Categorical                                                               | 1.04        | 0.60                      | 0.51                  | 0.55                  | 0.94          | 1.70                   | 5.79                   |
| Trend <sup>f</sup>                                                        | 1.00        | 0.21                      | 0.67                  | 0.74                  | 0.95          | 1.42                   | 1.77                   |
| Metolachlor                                                               |             |                           |                       |                       |               |                        |                        |
| Categorical                                                               | 1.00        | 0.27                      | 0.59                  | 0.66                  | 0.95          | 1.45                   | 2.29                   |
| Trend <sup>f</sup>                                                        | 1.00        | 0.22                      | 0.67                  | 0.74                  | 0.95          | 1.43                   | 1.79                   |
| Paraquat <sup>d</sup>                                                     |             |                           |                       |                       |               |                        |                        |
| Categorical                                                               | 1.04        | 0.46                      | 0.33                  | 0.58                  | 0.90          | 2.04                   | 2.74                   |
| Trend <sup>f</sup>                                                        | 1.00        | 0.31                      | 0.55                  | 0.64                  | 0.92          | 1.63                   | 2.08                   |

| <b>Cumulative lifetime days personally mixed or applied<sup>b,c</sup></b> | <b>Mean</b> | <b>Standard deviation</b> | <b>1st Percentile</b> | <b>5th Percentile</b> | <b>Median</b> | <b>95th Percentile</b> | <b>99th Percentile</b> |
|---------------------------------------------------------------------------|-------------|---------------------------|-----------------------|-----------------------|---------------|------------------------|------------------------|
| Pendimethalin <sup>d</sup>                                                |             |                           |                       |                       |               |                        |                        |
| Categorical                                                               | 1.02        | 0.36                      | 0.52                  | 0.61                  | 0.94          | 1.76                   | 2.38                   |
| Trend <sup>f</sup>                                                        | 0.99        | 0.31                      | 0.57                  | 0.64                  | 0.92          | 1.63                   | 2.13                   |
| Petroleum oil <sup>d</sup>                                                |             |                           |                       |                       |               |                        |                        |
| Categorical                                                               | 0.99        | 0.31                      | 0.54                  | 0.64                  | 0.94          | 1.60                   | 2.18                   |
| Trend <sup>f</sup>                                                        | 1.00        | 0.31                      | 0.57                  | 0.63                  | 0.93          | 1.65                   | 2.14                   |
| Trifluralin                                                               |             |                           |                       |                       |               |                        |                        |
| Categorical                                                               | 1.05        | 0.32                      | 0.52                  | 0.64                  | 1.02          | 1.46                   | 2.68                   |
| Trend <sup>f</sup>                                                        | 1.00        | 0.21                      | 0.68                  | 0.74                  | 0.95          | 1.42                   | 1.78                   |
| <i>Phenoxy herbicides</i>                                                 |             |                           |                       |                       |               |                        |                        |
| 2,4-D                                                                     |             |                           |                       |                       |               |                        |                        |
| Categorical                                                               | 1.10        | 0.37                      | 0.53                  | 0.64                  | 1.04          | 1.71                   | 2.86                   |
| Trend <sup>f</sup>                                                        | 1.00        | 0.21                      | 0.68                  | 0.74                  | 0.95          | 1.42                   | 1.76                   |
| 2,4,5-T <sup>d</sup>                                                      |             |                           |                       |                       |               |                        |                        |
| Categorical                                                               | 0.99        | 0.33                      | 0.33                  | 0.55                  | 0.92          | 1.63                   | 2.41                   |
| Trend <sup>f</sup>                                                        | 1.00        | 0.31                      | 0.58                  | 0.63                  | 0.93          | 1.64                   | 2.13                   |
| 2,4,5-TP <sup>d</sup>                                                     |             |                           |                       |                       |               |                        |                        |
| Categorical <sup>e</sup>                                                  | 0.99        | 0.31                      | 0.50                  | 0.64                  | 0.92          | 1.63                   | 2.15                   |
| Trend <sup>f</sup>                                                        | 1.00        | 0.31                      | 0.57                  | 0.63                  | 0.93          | 1.63                   | 2.13                   |
| <i>Triazine herbicides</i>                                                |             |                           |                       |                       |               |                        |                        |
| Atrazine                                                                  |             |                           |                       |                       |               |                        |                        |
| Categorical                                                               | 1.05        | 0.28                      | 0.54                  | 0.66                  | 1.02          | 1.51                   | 2.26                   |
| Trend <sup>f</sup>                                                        | 1.00        | 0.22                      | 0.68                  | 0.74                  | 0.95          | 1.45                   | 1.76                   |
| Cyanazine                                                                 |             |                           |                       |                       |               |                        |                        |
| Categorical                                                               | 1.02        | 0.40                      | 0.51                  | 0.58                  | 0.98          | 1.41                   | 3.65                   |
| Trend <sup>f</sup>                                                        | 1.00        | 0.21                      | 0.68                  | 0.74                  | 0.95          | 1.42                   | 1.85                   |
| Metribuzin <sup>d</sup>                                                   |             |                           |                       |                       |               |                        |                        |
| Categorical                                                               | 1.00        | 0.41                      | 0.41                  | 0.51                  | 0.94          | 1.51                   | 3.44                   |
| Trend <sup>f</sup>                                                        | 1.00        | 0.30                      | 0.57                  | 0.63                  | 0.93          | 1.62                   | 2.08                   |

| <b>Cumulative lifetime days personally mixed or applied<sup>b,c</sup></b> | <b>Mean</b> | <b>Standard deviation</b> | <b>1st Percentile</b> | <b>5th Percentile</b> | <b>Median</b> | <b>95th Percentile</b> | <b>99th Percentile</b> |
|---------------------------------------------------------------------------|-------------|---------------------------|-----------------------|-----------------------|---------------|------------------------|------------------------|
| <i><b>Insecticides</b></i>                                                |             |                           |                       |                       |               |                        |                        |
| <i>Carbamates<sup>g</sup></i>                                             |             |                           |                       |                       |               |                        |                        |
| Aldicarb <sup>d</sup>                                                     |             |                           |                       |                       |               |                        |                        |
| Categorical <sup>e</sup>                                                  | 1.00        | 0.43                      | 0.33                  | 0.59                  | 0.89          | 1.88                   | 2.92                   |
| Trend <sup>f</sup>                                                        | 0.99        | 0.30                      | 0.56                  | 0.64                  | 0.92          | 1.61                   | 2.08                   |
| Carbaryl <sup>d</sup>                                                     |             |                           |                       |                       |               |                        |                        |
| Categorical                                                               | 1.28        | 0.89                      | 0.44                  | 0.56                  | 0.87          | 3.25                   | 4.59                   |
| Trend <sup>f</sup>                                                        | 1.00        | 0.31                      | 0.55                  | 0.64                  | 0.92          | 1.63                   | 2.15                   |
| Carbofuran                                                                |             |                           |                       |                       |               |                        |                        |
| Categorical                                                               | 1.00        | 0.22                      | 0.60                  | 0.72                  | 0.95          | 1.43                   | 1.91                   |
| Trend <sup>f</sup>                                                        | 1.00        | 0.21                      | 0.68                  | 0.74                  | 0.95          | 1.42                   | 1.74                   |
| <i>Organochlorine insecticides</i>                                        |             |                           |                       |                       |               |                        |                        |
| Aldrin <sup>d</sup>                                                       |             |                           |                       |                       |               |                        |                        |
| Categorical                                                               | 0.98        | 0.32                      | 0.24                  | 0.41                  | 0.93          | 1.55                   | 2.36                   |
| Trend <sup>f</sup>                                                        | 1.00        | 0.30                      | 0.57                  | 0.64                  | 0.92          | 1.62                   | 2.08                   |
| Chlordane <sup>d</sup>                                                    |             |                           |                       |                       |               |                        |                        |
| Categorical                                                               | 0.99        | 0.40                      | 0.28                  | 0.53                  | 0.88          | 1.73                   | 2.79                   |
| Trend <sup>f</sup>                                                        | 1.00        | 0.31                      | 0.56                  | 0.64                  | 0.93          | 1.63                   | 2.09                   |
| DDT <sup>d</sup>                                                          |             |                           |                       |                       |               |                        |                        |
| Categorical                                                               | 0.99        | 0.43                      | 0.27                  | 0.43                  | 0.88          | 1.80                   | 3.03                   |
| Trend <sup>f</sup>                                                        | 1.00        | 0.31                      | 0.56                  | 0.64                  | 0.93          | 1.65                   | 2.12                   |
| Dieldrin <sup>d</sup>                                                     |             |                           |                       |                       |               |                        |                        |
| Categorical <sup>e</sup>                                                  | 0.99        | 0.31                      | 0.28                  | 0.65                  | 0.92          | 1.61                   | 2.12                   |
| Trend <sup>f</sup>                                                        | 1.00        | 0.31                      | 0.57                  | 0.63                  | 0.93          | 1.64                   | 2.11                   |
| Heptachlor <sup>d</sup>                                                   |             |                           |                       |                       |               |                        |                        |
| Categorical                                                               | 0.98        | 0.32                      | 0.25                  | 0.56                  | 0.92          | 1.57                   | 2.26                   |
| Trend <sup>f</sup>                                                        | 1.00        | 0.30                      | 0.57                  | 0.64                  | 0.92          | 1.62                   | 2.09                   |
| Lindane <sup>d</sup>                                                      |             |                           |                       |                       |               |                        |                        |
| Categorical                                                               | 0.99        | 0.30                      | 0.39                  | 0.66                  | 0.93          | 1.60                   | 2.18                   |
| Trend <sup>f</sup>                                                        | 1.00        | 0.31                      | 0.56                  | 0.64                  | 0.92          | 1.63                   | 2.09                   |



| <b>Cumulative lifetime days personally mixed or applied<sup>b,c</sup></b> | <b>Mean</b> | <b>Standard deviation</b> | <b>1st Percentile</b> | <b>5th Percentile</b> | <b>Median</b> | <b>95th Percentile</b> | <b>99th Percentile</b> |
|---------------------------------------------------------------------------|-------------|---------------------------|-----------------------|-----------------------|---------------|------------------------|------------------------|
| Toxaphene <sup>d</sup>                                                    |             |                           |                       |                       |               |                        |                        |
| Categorical                                                               | 1.00        | 0.34                      | 0.47                  | 0.64                  | 0.91          | 1.66                   | 2.26                   |
| Trend <sup>f</sup>                                                        | 1.00        | 0.31                      | 0.55                  | 0.63                  | 0.93          | 1.63                   | 2.12                   |
| <i>Organophosphate insecticides</i>                                       |             |                           |                       |                       |               |                        |                        |
| Chlorpyrifos                                                              |             |                           |                       |                       |               |                        |                        |
| Categorical                                                               | 1.00        | 0.22                      | 0.66                  | 0.73                  | 0.95          | 1.45                   | 1.84                   |
| Trend <sup>f</sup>                                                        | 1.00        | 0.22                      | 0.67                  | 0.73                  | 0.95          | 1.44                   | 1.80                   |
| Coumaphos                                                                 |             |                           |                       |                       |               |                        |                        |
| Categorical                                                               | 1.00        | 0.21                      | 0.65                  | 0.75                  | 0.96          | 1.41                   | 1.76                   |
| Trend <sup>f</sup>                                                        | 1.00        | 0.21                      | 0.67                  | 0.74                  | 0.95          | 1.42                   | 1.75                   |
| Diazinon <sup>d</sup>                                                     |             |                           |                       |                       |               |                        |                        |
| Categorical                                                               | 1.02        | 0.39                      | 0.37                  | 0.62                  | 0.91          | 1.80                   | 2.44                   |
| Trend <sup>f</sup>                                                        | 1.00        | 0.31                      | 0.56                  | 0.63                  | 0.92          | 1.62                   | 2.11                   |
| Dichlorvos                                                                |             |                           |                       |                       |               |                        |                        |
| Categorical                                                               | 0.99        | 0.20                      | 0.44                  | 0.76                  | 0.95          | 1.37                   | 1.81                   |
| Trend <sup>f</sup>                                                        | 1.00        | 0.21                      | 0.67                  | 0.74                  | 0.95          | 1.42                   | 1.75                   |
| Fonofos                                                                   |             |                           |                       |                       |               |                        |                        |
| Categorical                                                               | 0.98        | 0.22                      | 0.53                  | 0.65                  | 0.96          | 1.34                   | 1.90                   |
| Trend <sup>f</sup>                                                        | 1.00        | 0.21                      | 0.68                  | 0.74                  | 0.96          | 1.42                   | 1.78                   |
| Malathion <sup>d</sup>                                                    |             |                           |                       |                       |               |                        |                        |
| Categorical                                                               | 1.02        | 0.33                      | 0.49                  | 0.64                  | 0.94          | 1.65                   | 2.31                   |
| Trend <sup>f</sup>                                                        | 1.00        | 0.31                      | 0.56                  | 0.64                  | 0.92          | 1.63                   | 2.10                   |
| Parathion <sup>d</sup>                                                    |             |                           |                       |                       |               |                        |                        |
| Categorical                                                               | 1.00        | 0.35                      | 0.41                  | 0.62                  | 0.91          | 1.72                   | 2.31                   |
| Trend <sup>f</sup>                                                        | 1.00        | 0.31                      | 0.56                  | 0.63                  | 0.92          | 1.63                   | 2.11                   |
| Phorate <sup>d</sup>                                                      |             |                           |                       |                       |               |                        |                        |
| Categorical                                                               | 0.97        | 0.28                      | 0.46                  | 0.55                  | 0.93          | 1.46                   | 2.15                   |
| Trend <sup>f</sup>                                                        | 1.00        | 0.31                      | 0.57                  | 0.64                  | 0.92          | 1.62                   | 2.15                   |
| Terbufos                                                                  |             |                           |                       |                       |               |                        |                        |
| Categorical                                                               | 0.99        | 0.23                      | 0.59                  | 0.67                  | 0.97          | 1.36                   | 2.06                   |
| Trend <sup>f</sup>                                                        | 1.00        | 0.21                      | 0.68                  | 0.74                  | 0.95          | 1.42                   | 1.78                   |

| <b>Cumulative lifetime days personally mixed or applied<sup>b,c</sup></b> | <b>Mean</b> | <b>Standard deviation</b> | <b>1st Percentile</b> | <b>5th Percentile</b> | <b>Median</b> | <b>95th Percentile</b> | <b>99th Percentile</b> |
|---------------------------------------------------------------------------|-------------|---------------------------|-----------------------|-----------------------|---------------|------------------------|------------------------|
| <i>Pyrethroid insecticides</i>                                            |             |                           |                       |                       |               |                        |                        |
| Permethrin (for animals)                                                  |             |                           |                       |                       |               |                        |                        |
| Categorical                                                               | 0.99        | 0.22                      | 0.45                  | 0.73                  | 0.96          | 1.37                   | 1.82                   |
| Trend <sup>f</sup>                                                        | 1.00        | 0.21                      | 0.68                  | 0.74                  | 0.96          | 1.41                   | 1.72                   |
| Permethrin (for crops)                                                    |             |                           |                       |                       |               |                        |                        |
| Categorical                                                               | 1.00        | 0.24                      | 0.65                  | 0.73                  | 0.96          | 1.48                   | 1.89                   |
| Trend <sup>f</sup>                                                        | 1.00        | 0.21                      | 0.66                  | 0.74                  | 0.96          | 1.42                   | 1.76                   |

Abbreviations: 2,4-D, (2,4-dichlorophenoxy)acetic acid; 2,4,5-T, (2,4,5-trichlorophenoxy)acetic acid; 2,4,5-TP, (*RS*)-2-(2,4,5-trichlorophenoxy)propionic acid; DDT, 1,1,1-trichloro-2,2-bis(4-chlorophenyl)ethane; EPTC, *S*-ethyl dipropyl(thiocarbamate); POST, post-enrollment; PRE-B, pre-enrollment both; PRE-E, pre-enrollment enrollment only.

<sup>a</sup>Weights adjusted for age at enrollment (modeled with a restricted, quadratic spline with knots at ages 40, 48, and 57 years based on percentiles of the age distribution in cases), ever diagnosed with diabetes, education level, state of residence, not missing covariate data (conditional on age, state, the exposure, and pairwise interaction terms between each covariate and the exposure), and not dropping out of the AHS cohort (conditional on age, diabetes, education, state, the exposure, and pairwise interaction terms between each covariate and the exposure). <sup>b</sup>Category boundaries set at tertiles of cumulative lifetime days of use for each pesticide among all male private pesticide applicators who used it. <sup>c</sup>Fewer than five PRE-E, PRE-B, or POST cases (see footnote a at the bottom of Table S1 for a description of the three case groups) used trichlorfon or ziram at every exposure level. <sup>d</sup>Data available only for 11,982 applicators who completed the farmer questionnaire. Weights additionally adjusted for completing the farmer questionnaire (conditional on age, diabetes, education, and state). <sup>e</sup>Category boundaries set at the median of cumulative lifetime days of use for each pesticide among all male private pesticide applicators who used it. <sup>f</sup>Used within-category medians. <sup>g</sup>Benomyl is also included in carbamates.

**Table S5.** Cumulative lifetime days of use of individual pesticides and self-reported depression among male private pesticide applicators in the Agricultural Health Study.

| Cumulative lifetime days personally mixed or applied <sup>a,b</sup> | Non-cases [n (%)] | PRE-E <sup>c</sup> Cases [n (%)] | PRE-E <sup>c</sup> IP-weighted OR <sup>d</sup> (95% CI) | PRE-B <sup>c</sup> Cases [n (%)] | PRE-B <sup>c</sup> IP-weighted OR <sup>d</sup> (95% CI) | POST <sup>c</sup> Cases [n (%)] | POST <sup>c</sup> IP-weighted OR <sup>d</sup> (95% CI) | p for difference among ORs <sup>e</sup> |
|---------------------------------------------------------------------|-------------------|----------------------------------|---------------------------------------------------------|----------------------------------|---------------------------------------------------------|---------------------------------|--------------------------------------------------------|-----------------------------------------|
| Total                                                               | 19,506 (100)      | 474 (100)                        |                                                         | 540 (100)                        |                                                         | 688 (100)                       |                                                        |                                         |
| <b>Fumigants</b>                                                    |                   |                                  |                                                         |                                  |                                                         |                                 |                                                        |                                         |
| Aluminum phosphide <sup>f,g</sup>                                   |                   |                                  |                                                         |                                  |                                                         |                                 |                                                        |                                         |
| 0 (Median = 0.0)                                                    | 10,348 (96)       | 284 (95)                         | Reference                                               | 284 (94)                         | Reference                                               | 345 (94)                        | Reference                                              |                                         |
| 1-8 (3.5)                                                           | 217 (2)           | 6 (2)                            | 0.8 (0.3, 1.9)                                          | 11 (4)                           | 1.6 (0.8, 3.2)                                          | 13 (4)                          | 1.6 (0.8, 3.1)                                         |                                         |
| > 8 (14.5)                                                          | 168 (2)           | 9 (3)                            | 1.9 (0.9, 3.8)                                          | 6 (2)                            | 1.0 (0.4, 2.3)                                          | 8 (2)                           | 1.6 (0.7, 3.5)                                         | 0.48                                    |
| Missing                                                             | 257               | 7                                |                                                         | 14                               |                                                         | 5                               |                                                        |                                         |
| Trend (IQR = 8.8) <sup>h</sup>                                      |                   |                                  | 1.4 (0.9, 2.2)                                          |                                  | 1.1 (0.7, 1.7)                                          |                                 | 1.4 (0.9, 2.2)                                         | 0.58                                    |
| Carbon tetrachloride/carbon disulfide (80/20 mix) <sup>f,g</sup>    |                   |                                  |                                                         |                                  |                                                         |                                 |                                                        |                                         |
| 0 (Median = 0.0)                                                    | 10,210 (95)       | 277 (93)                         | Reference                                               | 284 (95)                         | Reference                                               | 343 (94)                        | Reference                                              |                                         |
| 1-12 (3.5)                                                          | 378 (4)           | 15 (5)                           | 1.7 (0.9, 3.2)                                          | 12 (4)                           | 1.3 (0.6, 2.4)                                          | 17 (5)                          | 1.2 (0.6, 2.2)                                         |                                         |
| > 12 (54.3)                                                         | 129 (1)           | 7 (2)                            | 2.1 (1.0, 4.7)                                          | 3 (1)                            | <sup>i</sup>                                            | 6 (2)                           | 1.2 (0.5, 2.7)                                         | 0.65                                    |
| Missing                                                             | 273               | 7                                |                                                         | 16                               |                                                         | 5                               |                                                        |                                         |
| Trend (IQR = 21.0) <sup>h</sup>                                     |                   |                                  | 1.4 (1.0, 1.8)                                          |                                  | 1.0 (0.6, 1.6)                                          |                                 | 1.1 (0.8, 1.5)                                         | 0.41                                    |
| Ethylene dibromide <sup>f</sup>                                     |                   |                                  |                                                         |                                  |                                                         |                                 |                                                        |                                         |
| 0 (0.0)                                                             | 10,294 (96)       | 280 (94)                         | Reference                                               | 285 (94)                         | Reference                                               | 349 (95)                        | Reference                                              |                                         |
| 1-8 (3.5)                                                           | 151 (1)           | 6 (2)                            | 1.3 (0.5, 3.8)                                          | 6 (2)                            | 1.7 (0.6, 4.9)                                          | 6 (2)                           | 1.0 (0.4, 2.8)                                         |                                         |
| 9-28 (15.5)                                                         | 174 (2)           | 6 (2)                            | 1.4 (0.6, 3.4)                                          | 4 (1)                            | <sup>i</sup>                                            | 6 (2)                           | 1.0 (0.4, 2.4)                                         |                                         |
| > 28 (87.5)                                                         | 107 (1)           | 7 (2)                            | 2.6 (1.2, 5.8)                                          | 7 (2)                            | 2.7 (1.2, 6.1)                                          | 5 (1)                           | 1.7 (0.6, 4.5)                                         | 0.94                                    |
| Missing                                                             | 264               | 7                                |                                                         | 13                               |                                                         | 5                               |                                                        |                                         |
| Trend (46.3) <sup>h</sup>                                           |                   |                                  | 1.7 (1.1, 2.5)                                          |                                  | 1.7 (1.1, 2.6)                                          |                                 | 1.3 (0.8, 2.2)                                         | 0.69                                    |
| Methyl bromide                                                      |                   |                                  |                                                         |                                  |                                                         |                                 |                                                        |                                         |
| 0 (0.0)                                                             | 16,516 (86)       | 392 (84)                         | Reference                                               | 446 (84)                         | Reference                                               | 568 (84)                        | Reference                                              |                                         |
| 1-12 (8.0)                                                          | 1,008 (5)         | 20 (4)                           | 1.0 (0.5, 2.1)                                          | 29 (5)                           | 1.2 (0.6, 2.1)                                          | 43 (6)                          | 1.5 (1.0, 2.4)                                         |                                         |
| 13-54 (28.0)                                                        | 1,221 (6)         | 36 (8)                           | 1.3 (0.9, 1.8)                                          | 35 (7)                           | 1.1 (0.8, 1.6)                                          | 35 (5)                          | 0.8 (0.6, 1.2)                                         |                                         |
| > 54 (122.5)                                                        | 512 (3)           | 18 (4)                           | 1.6 (1.0, 2.6)                                          | 20 (4)                           | 1.4 (0.9, 2.2)                                          | 27 (4)                          | 1.6 (1.1, 2.4)                                         | 0.59                                    |

| Cumulative lifetime days personally mixed or applied <sup>a,b</sup> | Non-cases [n (%)] | PRE-E <sup>c</sup> Cases [n (%)] | PRE-E <sup>c</sup> IP-weighted OR <sup>d</sup> (95% CI) | PRE-B <sup>c</sup> Cases [n (%)] | PRE-B <sup>c</sup> IP-weighted OR <sup>d</sup> (95% CI) | POST <sup>c</sup> Cases [n (%)] | POST <sup>c</sup> IP-weighted OR <sup>d</sup> (95% CI) | p for difference among ORs <sup>e</sup> |
|---------------------------------------------------------------------|-------------------|----------------------------------|---------------------------------------------------------|----------------------------------|---------------------------------------------------------|---------------------------------|--------------------------------------------------------|-----------------------------------------|
| Missing                                                             | 249               | 8                                |                                                         | 10                               |                                                         | 15                              |                                                        |                                         |
| Trend (46.3) <sup>h</sup>                                           |                   |                                  | 1.2 (1.0, 1.4)                                          |                                  | 1.1 (1.0, 1.4)                                          |                                 | 1.2 (1.0, 1.4)                                         | 0.88                                    |
| <b>Fungicides</b>                                                   |                   |                                  |                                                         |                                  |                                                         |                                 |                                                        |                                         |
| Benomyl <sup>f,g,j</sup>                                            |                   |                                  |                                                         |                                  |                                                         |                                 |                                                        |                                         |
| 0 (0.0)                                                             | 9,925 (93)        | 272 (92)                         | Reference                                               | 272 (92)                         | Reference                                               | 333 (92)                        | Reference                                              |                                         |
| 1-25 (12.3)                                                         | 435 (4)           | 15 (5)                           | 1.3 (0.7, 2.7)                                          | 13 (4)                           | 1.5 (0.8, 3.1)                                          | 17 (5)                          | 0.7 (0.4, 1.4)                                         |                                         |
| > 25 (103.3)                                                        | 313 (3)           | 9 (3)                            | 1.1 (0.5, 2.2)                                          | 12 (4)                           | 1.4 (0.8, 2.7)                                          | 14 (4)                          | 1.5 (0.8, 2.7)                                         | 0.50                                    |
| Missing                                                             | 317               | 10                               |                                                         | 18                               |                                                         | 7                               |                                                        |                                         |
| Trend (52.5) <sup>h</sup>                                           |                   |                                  | 1.0 (0.7, 1.5)                                          |                                  | 1.2 (0.9, 1.6)                                          |                                 | 1.2 (0.9, 1.7)                                         | 0.72                                    |
| Captan                                                              |                   |                                  |                                                         |                                  |                                                         |                                 |                                                        |                                         |
| 0 (0.0)                                                             | 16,187 (89)       | 385 (88)                         | Reference                                               | 415 (85)                         | Reference                                               | 552 (89)                        | Reference                                              |                                         |
| > 0-0.25 (0.3)                                                      | 1,194 (7)         | 31 (7)                           | 1.1 (0.7, 1.7)                                          | 50 (10)                          | 1.6 (1.2, 2.2)                                          | 32 (5)                          | 0.8 (0.5, 1.1)                                         |                                         |
| > 0.25-8 (3.5)                                                      | 187 (1)           | 2 (< 1)                          | <sup>i</sup>                                            | 7 (1)                            | 1.4 (0.6, 3.0)                                          | 9 (1)                           | 1.5 (0.7, 2.9)                                         |                                         |
| > 8 (64.0)                                                          | 590 (3)           | 20 (5)                           | 1.4 (0.9, 2.2)                                          | 19 (4)                           | 1.3 (0.8, 2.1)                                          | 29 (5)                          | 1.5 (1.0, 2.3)                                         | 0.06                                    |
| Missing                                                             | 1,348             | 36                               |                                                         | 49                               |                                                         | 66                              |                                                        |                                         |
| Trend (12.5) <sup>h</sup>                                           |                   |                                  | 1.1 (1.0, 1.2)                                          |                                  | 1.0 (1.0, 1.1)                                          |                                 | 1.1 (1.0, 1.2)                                         | 0.75                                    |
| Chlorothalonil                                                      |                   |                                  |                                                         |                                  |                                                         |                                 |                                                        |                                         |
| 0 (0.0)                                                             | 18,036 (94)       | 437 (94)                         | Reference                                               | 490 (93)                         | Reference                                               | 622 (92)                        | Reference                                              |                                         |
| 1-12 (8.0)                                                          | 427 (2)           | 10 (2)                           | 0.9 (0.4, 2.0)                                          | 19 (4)                           | 1.7 (0.9, 3.1)                                          | 19 (3)                          | 1.2 (0.6, 2.1)                                         |                                         |
| 13-88 (54.3)                                                        | 419 (2)           | 10 (2)                           | 1.2 (0.6, 2.4)                                          | 13 (2)                           | 1.2 (0.7, 2.1)                                          | 14 (2)                          | 1.2 (0.7, 2.2)                                         |                                         |
| > 88 (200.0)                                                        | 394 (2)           | 8 (2)                            | 0.8 (0.4, 1.7)                                          | 6 (1)                            | 0.6 (0.3, 1.5)                                          | 18 (3)                          | 1.3 (0.8, 2.1)                                         | 0.67                                    |
| Missing                                                             | 230               | 9                                |                                                         | 12                               |                                                         | 15                              |                                                        |                                         |
| Trend (111.8) <sup>h</sup>                                          |                   |                                  | 0.9 (0.6, 1.3)                                          |                                  | 0.8 (0.6, 1.2)                                          |                                 | 1.2 (0.9, 1.5)                                         | 0.32                                    |
| Maneb/mancozeb <sup>f</sup>                                         |                   |                                  |                                                         |                                  |                                                         |                                 |                                                        |                                         |
| 0 (0.0)                                                             | 9,896 (93)        | 268 (91)                         | Reference                                               | 273 (92)                         | Reference                                               | 330 (90)                        | Reference                                              |                                         |
| 1-12 (7.0)                                                          | 361 (3)           | 11 (4)                           | 1.4 (0.6, 3.1)                                          | 4 (1)                            | <sup>i</sup>                                            | 14 (4)                          | 1.1 (0.5, 2.3)                                         |                                         |
| 13-56 (50.8)                                                        | 238 (2)           | 10 (3)                           | 2.0 (1.0, 3.9)                                          | 7 (2)                            | 1.0 (0.5, 2.3)                                          | 13 (4)                          | 1.7 (0.9, 3.0)                                         |                                         |
| > 56 (224.8)                                                        | 197 (2)           | 5 (2)                            | 0.9 (0.4, 2.3)                                          | 14 (5)                           | 3.0 (1.7, 5.3)                                          | 8 (2)                           | 1.0 (0.5, 2.2)                                         | 0.12                                    |
| Missing                                                             | 298               | 12                               |                                                         | 17                               |                                                         | 6                               |                                                        |                                         |
| Trend (96.3) <sup>h</sup>                                           |                   |                                  | 1.0 (0.8, 1.4)                                          |                                  | 1.6 (1.2, 2.0)                                          |                                 | 1.1 (0.8, 1.4)                                         | 0.04                                    |

| Cumulative lifetime days personally mixed or applied <sup>a,b</sup> | Non-cases [n (%)] | PRE-E <sup>c</sup> Cases [n (%)] | PRE-E <sup>c</sup> IP-weighted OR <sup>d</sup> (95% CI) | PRE-B <sup>c</sup> Cases [n (%)] | PRE-B <sup>c</sup> IP-weighted OR <sup>d</sup> (95% CI) | POST <sup>c</sup> Cases [n (%)] | POST <sup>c</sup> IP-weighted OR <sup>d</sup> (95% CI) | p for difference among ORs <sup>e</sup> |
|---------------------------------------------------------------------|-------------------|----------------------------------|---------------------------------------------------------|----------------------------------|---------------------------------------------------------|---------------------------------|--------------------------------------------------------|-----------------------------------------|
| <b>Metalaxyl<sup>f</sup></b>                                        |                   |                                  |                                                         |                                  |                                                         |                                 |                                                        |                                         |
| 0 (0.0)                                                             | 8,790 (83)        | 238 (81)                         | Reference                                               | 242 (81)                         | Reference                                               | 304 (85)                        | Reference                                              |                                         |
| 1-12 (3.5)                                                          | 1,015 (10)        | 32 (11)                          | 1.0 (0.6, 1.7)                                          | 29 (10)                          | 1.4 (0.9, 2.2)                                          | 30 (8)                          | 0.7 (0.5, 1.1)                                         |                                         |
| 13-28 (28.0)                                                        | 353 (3)           | 10 (3)                           | 0.9 (0.5, 1.8)                                          | 8 (3)                            | 0.8 (0.4, 1.8)                                          | 12 (3)                          | 0.8 (0.4, 1.6)                                         |                                         |
| > 28 (56.0)                                                         | 486 (5)           | 14 (5)                           | 1.1 (0.6, 2.0)                                          | 20 (7)                           | 1.4 (0.9, 2.3)                                          | 10 (3)                          | 0.7 (0.3, 1.3)                                         | 0.31                                    |
| Missing                                                             | 346               | 12                               |                                                         | 16                               |                                                         | 15                              |                                                        |                                         |
| Trend (50.8) <sup>h</sup>                                           |                   |                                  | 1.1 (0.7, 1.8)                                          |                                  | 1.3 (0.8, 2.0)                                          |                                 | 0.7 (0.4, 1.2)                                         | 0.20                                    |
| <b>Herbicides</b>                                                   |                   |                                  |                                                         |                                  |                                                         |                                 |                                                        |                                         |
| <b>Alachlor</b>                                                     |                   |                                  |                                                         |                                  |                                                         |                                 |                                                        |                                         |
| 0 (0.0)                                                             | 8,201 (45)        | 172 (38)                         | Reference                                               | 197 (38)                         | Reference                                               | 272 (42)                        | Reference                                              |                                         |
| 1-25 (8.8)                                                          | 4,619 (25)        | 121 (27)                         | 1.3 (1.0, 1.6)                                          | 137 (27)                         | 1.2 (0.9, 1.5)                                          | 179 (28)                        | 1.2 (1.0, 1.5)                                         |                                         |
| 26-109 (56.0)                                                       | 3,167 (17)        | 94 (21)                          | 1.5 (1.1, 1.9)                                          | 108 (21)                         | 1.4 (1.1, 1.8)                                          | 110 (17)                        | 1.0 (0.8, 1.3)                                         |                                         |
| > 109 (224.8)                                                       | 2,440 (13)        | 68 (15)                          | 1.4 (1.0, 1.8)                                          | 72 (14)                          | 1.2 (0.9, 1.6)                                          | 86 (13)                         | 1.1 (0.9, 1.4)                                         | 0.42                                    |
| Missing                                                             | 1,079             | 19                               |                                                         | 26                               |                                                         | 41                              |                                                        |                                         |
| Trend (96.0) <sup>h</sup>                                           |                   |                                  | 1.1 (1.0, 1.2)                                          |                                  | 1.1 (1.0, 1.2)                                          |                                 | 1.0 (0.9, 1.1)                                         | 0.53                                    |
| <b>Butylate<sup>f</sup></b>                                         |                   |                                  |                                                         |                                  |                                                         |                                 |                                                        |                                         |
| 0 (0.0)                                                             | 7,616 (71)        | 207 (71)                         | Reference                                               | 200 (66)                         | Reference                                               | 263 (73)                        | Reference                                              |                                         |
| 1-9 (8.8)                                                           | 1,080 (10)        | 32 (11)                          | 1.2 (0.8, 1.8)                                          | 37 (12)                          | 1.0 (0.7, 1.5)                                          | 30 (8)                          | 0.7 (0.4, 1.0)                                         |                                         |
| 10-51 (24.5)                                                        | 1,147 (11)        | 28 (10)                          | 0.9 (0.6, 1.4)                                          | 37 (12)                          | 1.2 (0.8, 1.8)                                          | 45 (12)                         | 1.1 (0.8, 1.6)                                         |                                         |
| > 51 (108.5)                                                        | 846 (8)           | 24 (8)                           | 1.1 (0.7, 1.7)                                          | 28 (9)                           | 1.2 (0.8, 1.8)                                          | 24 (7)                          | 0.8 (0.5, 1.3)                                         | 0.27                                    |
| Missing                                                             | 301               | 15                               |                                                         | 13                               |                                                         | 9                               |                                                        |                                         |
| Trend (47.3) <sup>h</sup>                                           |                   |                                  | 1.0 (0.8, 1.3)                                          |                                  | 1.1 (0.9, 1.3)                                          |                                 | 0.9 (0.8, 1.1)                                         | 0.46                                    |
| <b>Chlorimuron-ethyl<sup>f</sup></b>                                |                   |                                  |                                                         |                                  |                                                         |                                 |                                                        |                                         |
| 0 (0.0)                                                             | 7,240 (68)        | 210 (71)                         | Reference                                               | 185 (61)                         | Reference                                               | 249 (68)                        | Reference                                              |                                         |
| 1-9 (8.8)                                                           | 2,264 (21)        | 51 (17)                          | 0.7 (0.5, 1.0)                                          | 82 (27)                          | 1.4 (1.1, 1.9)                                          | 76 (21)                         | 1.0 (0.7, 1.3)                                         |                                         |
| 10-25 (24.5)                                                        | 673 (6)           | 16 (5)                           | 0.8 (0.5, 1.4)                                          | 21 (7)                           | 1.2 (0.8, 2.0)                                          | 26 (7)                          | 1.2 (0.7, 1.8)                                         |                                         |
| > 25 (56.0)                                                         | 530 (5)           | 20 (7)                           | 1.3 (0.8, 2.1)                                          | 13 (4)                           | 0.9 (0.5, 1.6)                                          | 14 (4)                          | 0.7 (0.4, 1.3)                                         | 0.03                                    |
| Missing                                                             | 283               | 9                                |                                                         | 14                               |                                                         | 6                               |                                                        |                                         |
| Trend (15.8) <sup>h</sup>                                           |                   |                                  | 1.0 (0.9, 1.2)                                          |                                  | 1.0 (0.9, 1.1)                                          |                                 | 0.9 (0.8, 1.1)                                         | 0.64                                    |

| Cumulative lifetime days personally mixed or applied <sup>a,b</sup> | Non-cases [n (%)] | PRE-E <sup>c</sup> Cases [n (%)] | PRE-E <sup>c</sup> IP-weighted OR <sup>d</sup> (95% CI) | PRE-B <sup>c</sup> Cases [n (%)] | PRE-B <sup>c</sup> IP-weighted OR <sup>d</sup> (95% CI) | POST <sup>c</sup> Cases [n (%)] | POST <sup>c</sup> IP-weighted OR <sup>d</sup> (95% CI) | p for difference among ORs <sup>e</sup> |
|---------------------------------------------------------------------|-------------------|----------------------------------|---------------------------------------------------------|----------------------------------|---------------------------------------------------------|---------------------------------|--------------------------------------------------------|-----------------------------------------|
| <b>Dicamba</b>                                                      |                   |                                  |                                                         |                                  |                                                         |                                 |                                                        |                                         |
| 0 (0.0)                                                             | 8,367 (45)        | 209 (46)                         | Reference                                               | 217 (43)                         | Reference                                               | 280 (44)                        | Reference                                              |                                         |
| 1-20 (8.8)                                                          | 4,315 (23)        | 93 (20)                          | 0.8 (0.6, 1.1)                                          | 134 (27)                         | 1.0 (0.8, 1.3)                                          | 146 (23)                        | 0.9 (0.7, 1.2)                                         |                                         |
| 21-56 (38.8)                                                        | 3,010 (16)        | 74 (16)                          | 1.0 (0.7, 1.3)                                          | 77 (15)                          | 1.0 (0.8, 1.3)                                          | 100 (16)                        | 1.0 (0.8, 1.3)                                         |                                         |
| > 56 (116.0)                                                        | 2,715 (15)        | 78 (17)                          | 1.1 (0.9, 1.5)                                          | 77 (15)                          | 1.1 (0.9, 1.5)                                          | 107 (17)                        | 1.2 (1.0, 1.5)                                         | 0.94                                    |
| Missing                                                             | 1,099             | 20                               |                                                         | 35                               |                                                         | 55                              |                                                        |                                         |
| Trend (99.8) <sup>h</sup>                                           |                   |                                  | 1.1 (0.9, 1.4)                                          |                                  | 1.1 (0.9, 1.3)                                          |                                 | 1.1 (0.9, 1.4)                                         | 0.93                                    |
| <b>EPTC</b>                                                         |                   |                                  |                                                         |                                  |                                                         |                                 |                                                        |                                         |
| 0 (0.0)                                                             | 14,440 (79)       | 335 (75)                         | Reference                                               | 397 (80)                         | Reference                                               | 492 (77)                        | Reference                                              |                                         |
| 1-9 (8.8)                                                           | 1,800 (10)        | 50 (11)                          | 1.2 (0.9, 1.7)                                          | 47 (9)                           | 1.0 (0.7, 1.4)                                          | 77 (12)                         | 1.2 (0.9, 1.6)                                         |                                         |
| 10-25 (24.5)                                                        | 920 (5)           | 24 (5)                           | 1.1 (0.7, 1.7)                                          | 26 (5)                           | 1.1 (0.7, 1.7)                                          | 38 (6)                          | 1.2 (0.8, 1.7)                                         |                                         |
| > 25 (103.3)                                                        | 1,212 (7)         | 38 (9)                           | 1.4 (1.0, 1.9)                                          | 28 (6)                           | 0.9 (0.6, 1.3)                                          | 36 (6)                          | 0.9 (0.6, 1.2)                                         | 0.55                                    |
| Missing                                                             | 1,134             | 27                               |                                                         | 42                               |                                                         | 45                              |                                                        |                                         |
| Trend (47.3) <sup>h</sup>                                           |                   |                                  | 1.1 (1.0, 1.3)                                          |                                  | 1.0 (0.8, 1.1)                                          |                                 | 0.9 (0.8, 1.1)                                         | 0.15                                    |
| <b>Glyphosate</b>                                                   |                   |                                  |                                                         |                                  |                                                         |                                 |                                                        |                                         |
| 0 (0.0)                                                             | 4,371 (23)        | 94 (20)                          | Reference                                               | 113 (21)                         | Reference                                               | 143 (21)                        | Reference                                              |                                         |
| 1-20 (8.8)                                                          | 6,219 (32)        | 135 (29)                         | 1.1 (0.8, 1.4)                                          | 203 (38)                         | 1.3 (1.0, 1.6)                                          | 219 (32)                        | 1.0 (0.8, 1.3)                                         |                                         |
| 21-56 (38.8)                                                        | 4,497 (23)        | 116 (25)                         | 1.2 (0.9, 1.6)                                          | 107 (20)                         | 0.9 (0.6, 1.1)                                          | 150 (22)                        | 1.1 (0.8, 1.4)                                         |                                         |
| > 56 (116.0)                                                        | 4,183 (22)        | 124 (26)                         | 1.4 (1.0, 1.8)                                          | 112 (21)                         | 1.0 (0.8, 1.3)                                          | 163 (24)                        | 1.2 (0.9, 1.5)                                         | 0.04                                    |
| Missing                                                             | 236               | 5                                |                                                         | 5                                |                                                         | 13                              |                                                        |                                         |
| Trend (99.8) <sup>h</sup>                                           |                   |                                  | 1.3 (1.1, 1.6)                                          |                                  | 0.9 (0.7, 1.1)                                          |                                 | 1.1 (1.0, 1.4)                                         | 0.02                                    |
| <b>Imazethapyr</b>                                                  |                   |                                  |                                                         |                                  |                                                         |                                 |                                                        |                                         |
| 0 (0.0)                                                             | 10,075 (55)       | 240 (54)                         | Reference                                               | 288 (58)                         | Reference                                               | 347 (54)                        | Reference                                              |                                         |
| 1-9 (8.8)                                                           | 3,733 (20)        | 91 (20)                          | 1.1 (0.8, 1.5)                                          | 97 (20)                          | 1.0 (0.7, 1.4)                                          | 129 (20)                        | 1.2 (0.9, 1.6)                                         |                                         |
| 10-25 (24.5)                                                        | 2,639 (14)        | 61 (14)                          | 1.0 (0.7, 1.3)                                          | 72 (14)                          | 1.0 (0.7, 1.3)                                          | 105 (16)                        | 1.2 (0.9, 1.5)                                         |                                         |
| > 25 (56.0)                                                         | 1,975 (11)        | 53 (12)                          | 1.1 (0.8, 1.5)                                          | 40 (8)                           | 0.7 (0.5, 1.0)                                          | 66 (10)                         | 1.0 (0.7, 1.3)                                         | 0.57                                    |
| Missing                                                             | 1,084             | 29                               |                                                         | 43                               |                                                         | 41                              |                                                        |                                         |
| Trend (30.0) <sup>h</sup>                                           |                   |                                  | 1.0 (0.9, 1.2)                                          |                                  | 0.9 (0.7, 1.0)                                          |                                 | 1.0 (0.9, 1.1)                                         | 0.28                                    |

| Cumulative lifetime days personally mixed or applied <sup>a,b</sup> | Non-cases [n (%)] | PRE-E <sup>c</sup> Cases [n (%)] | PRE-E <sup>c</sup> IP-weighted OR <sup>d</sup> (95% CI) | PRE-B <sup>c</sup> Cases [n (%)] | PRE-B <sup>c</sup> IP-weighted OR <sup>d</sup> (95% CI) | POST <sup>c</sup> Cases [n (%)] | POST <sup>c</sup> IP-weighted OR <sup>d</sup> (95% CI) | p for difference among ORs <sup>e</sup> |
|---------------------------------------------------------------------|-------------------|----------------------------------|---------------------------------------------------------|----------------------------------|---------------------------------------------------------|---------------------------------|--------------------------------------------------------|-----------------------------------------|
| Metolachlor                                                         |                   |                                  |                                                         |                                  |                                                         |                                 |                                                        |                                         |
| 0 (0.0)                                                             | 9,560 (52)        | 224 (50)                         | Reference                                               | 281 (56)                         | Reference                                               | 341 (52)                        | Reference                                              |                                         |
| 1-25 (8.8)                                                          | 4,309 (23)        | 101 (22)                         | 1.1 (0.8, 1.4)                                          | 116 (23)                         | 0.9 (0.7, 1.2)                                          | 139 (21)                        | 1.0 (0.8, 1.2)                                         |                                         |
| 26-56 (56.0)                                                        | 1,898 (10)        | 47 (10)                          | 1.0 (0.8, 1.4)                                          | 50 (10)                          | 0.9 (0.7, 1.2)                                          | 78 (12)                         | 1.1 (0.9, 1.5)                                         |                                         |
| > 56 (116.0)                                                        | 2,732 (15)        | 79 (18)                          | 1.2 (0.9, 1.6)                                          | 55 (11)                          | 0.7 (0.5, 1.0)                                          | 92 (14)                         | 1.0 (0.8, 1.2)                                         | 0.26                                    |
| Missing                                                             | 977               | 23                               |                                                         | 38                               |                                                         | 38                              |                                                        |                                         |
| Trend (88.5) <sup>h</sup>                                           |                   |                                  | 1.1 (0.9, 1.4)                                          |                                  | 0.8 (0.6, 1.0)                                          |                                 | 1.0 (0.8, 1.2)                                         | 0.03                                    |
| Paraquat <sup>f</sup>                                               |                   |                                  |                                                         |                                  |                                                         |                                 |                                                        |                                         |
| 0 (0.0)                                                             | 9,054 (84)        | 245 (82)                         | Reference                                               | 253 (85)                         | Reference                                               | 309 (86)                        | Reference                                              |                                         |
| 1-9 (8.8)                                                           | 911 (9)           | 30 (10)                          | 1.6 (1.0, 2.4)                                          | 32 (11)                          | 1.2 (0.7, 1.8)                                          | 25 (7)                          | 0.7 (0.4, 1.2)                                         |                                         |
| 10-25 (24.5)                                                        | 309 (3)           | 11 (4)                           | 1.2 (0.6, 2.4)                                          | 3 (1)                            |                                                         | 12 (3)                          | 0.9 (0.5, 1.6)                                         |                                         |
| > 25 (108.5)                                                        | 442 (4)           | 11 (4)                           | 0.9 (0.5, 1.8)                                          | 10 (3)                           | 0.7 (0.3, 1.3)                                          | 15 (4)                          | 1.1 (0.6, 1.9)                                         | 0.13                                    |
| Missing                                                             | 274               | 9                                |                                                         | 17                               |                                                         | 10                              |                                                        |                                         |
| Trend (42.0) <sup>h</sup>                                           |                   |                                  | 1.0 (0.8, 1.3)                                          |                                  | 0.8 (0.6, 1.1)                                          |                                 | 1.0 (0.8, 1.3)                                         | 0.56                                    |
| Pendimethalin <sup>f</sup>                                          |                   |                                  |                                                         |                                  |                                                         |                                 |                                                        |                                         |
| 0 (0.0)                                                             | 6,752 (63)        | 182 (61)                         | Reference                                               | 192 (64)                         | Reference                                               | 249 (68)                        | Reference                                              |                                         |
| 1-9 (8.8)                                                           | 1,804 (17)        | 48 (16)                          | 1.0 (0.7, 1.4)                                          | 63 (21)                          | 1.2 (0.9, 1.6)                                          | 55 (15)                         | 0.7 (0.6, 1.0)                                         |                                         |
| 10-25 (24.5)                                                        | 1,000 (9)         | 28 (9)                           | 1.0 (0.6, 1.5)                                          | 18 (6)                           | 0.5 (0.3, 0.9)                                          | 30 (8)                          | 0.8 (0.5, 1.2)                                         |                                         |
| > 25 (56.0)                                                         | 1,138 (11)        | 38 (13)                          | 1.2 (0.8, 1.8)                                          | 26 (9)                           | 0.8 (0.5, 1.2)                                          | 30 (8)                          | 0.7 (0.5, 1.1)                                         | 0.06                                    |
| Missing                                                             | 296               | 10                               |                                                         | 16                               |                                                         | 7                               |                                                        |                                         |
| Trend (42.0) <sup>h</sup>                                           |                   |                                  | 1.1 (0.9, 1.5)                                          |                                  | 0.8 (0.5, 1.1)                                          |                                 | 0.8 (0.6, 1.0)                                         | 0.09                                    |
| Petroleum oil <sup>f</sup>                                          |                   |                                  |                                                         |                                  |                                                         |                                 |                                                        |                                         |
| 0 (0.0)                                                             | 8,295 (78)        | 223 (76)                         | Reference                                               | 218 (74)                         | Reference                                               | 272 (75)                        | Reference                                              |                                         |
| 1-20 (8.8)                                                          | 1,002 (9)         | 22 (8)                           | 0.9 (0.6, 1.5)                                          | 34 (11)                          | 1.2 (0.8, 1.7)                                          | 34 (9)                          | 1.1 (0.7, 1.6)                                         |                                         |
| 21-56 (38.8)                                                        | 653 (6)           | 16 (5)                           | 0.8 (0.5, 1.5)                                          | 18 (6)                           | 1.0 (0.6, 1.6)                                          | 31 (9)                          | 1.4 (1.0, 2.1)                                         |                                         |
| > 56 (224.8)                                                        | 680 (6)           | 32 (11)                          | 1.6 (1.1, 2.4)                                          | 26 (9)                           | 1.4 (0.9, 2.1)                                          | 25 (7)                          | 1.1 (0.7, 1.7)                                         | 0.50                                    |
| Missing                                                             | 360               | 13                               |                                                         | 19                               |                                                         | 9                               |                                                        |                                         |
| Trend (99.8) <sup>h</sup>                                           |                   |                                  | 1.2 (1.0, 1.5)                                          |                                  | 1.1 (0.9, 1.4)                                          |                                 | 1.1 (0.9, 1.3)                                         | 0.51                                    |

| Cumulative lifetime days personally mixed or applied <sup>a,b</sup> | Non-cases [n (%)] | PRE-E <sup>c</sup> Cases [n (%)] | PRE-E <sup>c</sup> IP-weighted OR <sup>d</sup> (95% CI) | PRE-B <sup>c</sup> Cases [n (%)] | PRE-B <sup>c</sup> IP-weighted OR <sup>d</sup> (95% CI) | POST <sup>c</sup> Cases [n (%)] | POST <sup>c</sup> IP-weighted OR <sup>d</sup> (95% CI) | p for difference among ORs <sup>e</sup> |
|---------------------------------------------------------------------|-------------------|----------------------------------|---------------------------------------------------------|----------------------------------|---------------------------------------------------------|---------------------------------|--------------------------------------------------------|-----------------------------------------|
| Trifluralin                                                         |                   |                                  |                                                         |                                  |                                                         |                                 |                                                        |                                         |
| 0 (0.0)                                                             | 8,343 (45)        | 183 (41)                         | Reference                                               | 218 (43)                         | Reference                                               | 285 (45)                        | Reference                                              |                                         |
| 1-25 (20.0)                                                         | 3,512 (19)        | 84 (19)                          | 1.2 (0.9, 1.6)                                          | 109 (21)                         | 1.2 (0.9, 1.5)                                          | 111 (17)                        | 1.1 (0.8, 1.4)                                         |                                         |
| 26-109 (56.0)                                                       | 3,953 (21)        | 94 (21)                          | 1.1 (0.9, 1.4)                                          | 111 (22)                         | 1.1 (0.9, 1.4)                                          | 147 (23)                        | 1.1 (0.9, 1.3)                                         |                                         |
| > 109 (224.8)                                                       | 2,600 (14)        | 86 (19)                          | 1.5 (1.1, 1.9)                                          | 73 (14)                          | 1.1 (0.8, 1.4)                                          | 94 (15)                         | 1.1 (0.8, 1.4)                                         | 0.61                                    |
| Missing                                                             | 1,098             | 27                               |                                                         | 29                               |                                                         | 51                              |                                                        |                                         |
| Trend (91.5) <sup>h</sup>                                           |                   |                                  | 1.2 (1.0, 1.3)                                          |                                  | 1.0 (0.9, 1.1)                                          |                                 | 1.0 (0.9, 1.1)                                         | 0.19                                    |
| <i>Phenoxy herbicides</i>                                           |                   |                                  |                                                         |                                  |                                                         |                                 |                                                        |                                         |
| 2,4-D                                                               |                   |                                  |                                                         |                                  |                                                         |                                 |                                                        |                                         |
| 0 (0.0)                                                             | 3,976 (21)        | 91 (20)                          | Reference                                               | 95 (18)                          | Reference                                               | 151 (23)                        | Reference                                              |                                         |
| 1-39 (20.0)                                                         | 5,950 (31)        | 100 (22)                         | 0.7 (0.5, 1.0)                                          | 174 (33)                         | 1.2 (0.9, 1.6)                                          | 210 (31)                        | 1.0 (0.8, 1.2)                                         |                                         |
| 40-116 (87.5)                                                       | 4,629 (24)        | 135 (29)                         | 1.3 (1.0, 1.7)                                          | 133 (25)                         | 1.3 (1.0, 1.7)                                          | 161 (24)                        | 0.9 (0.7, 1.2)                                         |                                         |
| > 116 (245.0)                                                       | 4,575 (24)        | 137 (30)                         | 1.3 (1.0, 1.7)                                          | 131 (25)                         | 1.3 (1.0, 1.6)                                          | 147 (22)                        | 0.9 (0.7, 1.1)                                         | < 0.01                                  |
| Missing                                                             | 376               | 11                               |                                                         | 7                                |                                                         | 19                              |                                                        |                                         |
| Trend (154.0) <sup>h</sup>                                          |                   |                                  | 1.3 (1.1, 1.5)                                          |                                  | 1.1 (0.9, 1.2)                                          |                                 | 0.9 (0.8, 1.1)                                         | < 0.01                                  |
| 2,4,5-T <sup>f</sup>                                                |                   |                                  |                                                         |                                  |                                                         |                                 |                                                        |                                         |
| 0 (0.0)                                                             | 8,541 (80)        | 204 (70)                         | Reference                                               | 223 (74)                         | Reference                                               | 290 (81)                        | Reference                                              |                                         |
| 1-9 (8.8)                                                           | 1,240 (12)        | 52 (18)                          | 1.9 (1.3, 2.7)                                          | 42 (14)                          | 1.4 (0.9, 2.1)                                          | 44 (12)                         | 1.1 (0.7, 1.5)                                         |                                         |
| 10-25 (22.3)                                                        | 382 (4)           | 21 (7)                           | 2.2 (1.4, 3.6)                                          | 15 (5)                           | 1.5 (0.9, 2.6)                                          | 11 (3)                          | 0.8 (0.4, 1.5)                                         |                                         |
| > 25 (62.5)                                                         | 518 (5)           | 16 (5)                           | 1.3 (0.8, 2.3)                                          | 20 (7)                           | 1.5 (0.9, 2.4)                                          | 14 (4)                          | 0.7 (0.4, 1.3)                                         | 0.03                                    |
| Missing                                                             | 309               | 13                               |                                                         | 15                               |                                                         | 12                              |                                                        |                                         |
| Trend (30.0) <sup>h</sup>                                           |                   |                                  | 1.3 (1.1, 1.6)                                          |                                  | 1.3 (1.0, 1.6)                                          |                                 | 0.9 (0.7, 1.1)                                         | 0.03                                    |
| 2,4,5-TP <sup>f,9</sup>                                             |                   |                                  |                                                         |                                  |                                                         |                                 |                                                        |                                         |
| 0 (0.0)                                                             | 10,114 (95)       | 268 (91)                         | Reference                                               | 281 (94)                         | Reference                                               | 338 (94)                        | Reference                                              |                                         |
| 1-20 (8.8)                                                          | 319 (3)           | 13 (4)                           | 1.9 (1.0, 3.5)                                          | 12 (4)                           | 1.5 (0.8, 3.1)                                          | 17 (5)                          | 1.7 (1.0, 3.0)                                         |                                         |
| > 20 (56.0)                                                         | 223 (2)           | 12 (4)                           | 2.1 (1.1, 3.9)                                          | 7 (2)                            | 1.1 (0.5, 2.5)                                          | 5 (1)                           | 0.6 (0.2, 1.5)                                         | 0.23                                    |
| Missing                                                             | 334               | 13                               |                                                         | 15                               |                                                         | 11                              |                                                        |                                         |
| Trend (47.4) <sup>h</sup>                                           |                   |                                  | 2.0 (1.2, 3.2)                                          |                                  | 1.2 (0.6, 2.2)                                          |                                 | 0.8 (0.4, 1.5)                                         | 0.05                                    |



| Cumulative lifetime days personally mixed or applied <sup>a,b</sup> | Non-cases [n (%)] | PRE-E <sup>c</sup> Cases [n (%)] | PRE-E <sup>c</sup> IP-weighted OR <sup>d</sup> (95% CI) | PRE-B <sup>c</sup> Cases [n (%)] | PRE-B <sup>c</sup> IP-weighted OR <sup>d</sup> (95% CI) | POST <sup>c</sup> Cases [n (%)] | POST <sup>c</sup> IP-weighted OR <sup>d</sup> (95% CI) | p for difference among ORs <sup>e</sup> |
|---------------------------------------------------------------------|-------------------|----------------------------------|---------------------------------------------------------|----------------------------------|---------------------------------------------------------|---------------------------------|--------------------------------------------------------|-----------------------------------------|
| <b>Triazine herbicides</b>                                          |                   |                                  |                                                         |                                  |                                                         |                                 |                                                        |                                         |
| <b>Atrazine</b>                                                     |                   |                                  |                                                         |                                  |                                                         |                                 |                                                        |                                         |
| 0 (0.0)                                                             | 4,854 (25)        | 100 (21)                         | Reference                                               | 122 (23)                         | Reference                                               | 173 (26)                        | Reference                                              |                                         |
| 1-25 (8.8)                                                          | 4,748 (25)        | 105 (22)                         | 1.0 (0.8, 1.4)                                          | 120 (23)                         | 1.0 (0.7, 1.2)                                          | 179 (26)                        | 1.1 (0.9, 1.4)                                         |                                         |
| 26-109 (56.0)                                                       | 5,353 (28)        | 131 (28)                         | 1.2 (0.9, 1.6)                                          | 175 (33)                         | 1.3 (1.0, 1.7)                                          | 159 (23)                        | 0.8 (0.7, 1.1)                                         |                                         |
| > 109 (224.8)                                                       | 4,285 (22)        | 133 (28)                         | 1.5 (1.2, 2.0)                                          | 116 (22)                         | 1.0 (0.8, 1.4)                                          | 166 (25)                        | 1.1 (0.9, 1.4)                                         | < 0.01                                  |
| Missing                                                             | 266               | 5                                |                                                         | 7                                |                                                         | 11                              |                                                        |                                         |
| Trend (158.5) <sup>h</sup>                                          |                   |                                  | 1.3 (1.1, 1.5)                                          |                                  | 1.0 (0.9, 1.2)                                          |                                 | 1.1 (0.9, 1.2)                                         | 0.11                                    |
| <b>Cyanazine</b>                                                    |                   |                                  |                                                         |                                  |                                                         |                                 |                                                        |                                         |
| 0 (0.0)                                                             | 10,284 (55)       | 222 (49)                         | Reference                                               | 259 (50)                         | Reference                                               | 350 (54)                        | Reference                                              |                                         |
| 1-20 (8.8)                                                          | 3,375 (18)        | 77 (17)                          | 1.0 (0.7, 1.4)                                          | 92 (18)                          | 1.0 (0.7, 1.3)                                          | 128 (20)                        | 1.2 (1.0, 1.6)                                         |                                         |
| 21-56 (38.8)                                                        | 2,611 (14)        | 79 (17)                          | 1.4 (1.1, 1.9)                                          | 89 (17)                          | 1.3 (1.0, 1.7)                                          | 90 (14)                         | 1.0 (0.8, 1.3)                                         |                                         |
| > 56 (116.0)                                                        | 2,276 (12)        | 74 (16)                          | 1.5 (1.2, 2.0)                                          | 75 (15)                          | 1.3 (1.0, 1.8)                                          | 82 (13)                         | 1.1 (0.8, 1.3)                                         | 0.05                                    |
| Missing                                                             | 960               | 22                               |                                                         | 25                               |                                                         | 38                              |                                                        |                                         |
| Trend (99.8) <sup>h</sup>                                           |                   |                                  | 1.4 (1.2, 1.8)                                          |                                  | 1.3 (1.0, 1.6)                                          |                                 | 1.0 (0.8, 1.3)                                         | 0.10                                    |
| <b>Metribuzin<sup>f</sup></b>                                       |                   |                                  |                                                         |                                  |                                                         |                                 |                                                        |                                         |
| 0 (0.0)                                                             | 6,347 (59)        | 169 (57)                         | Reference                                               | 160 (54)                         | Reference                                               | 226 (62)                        | Reference                                              |                                         |
| 1-9 (8.8)                                                           | 2,099 (20)        | 65 (22)                          | 1.3 (0.9, 1.9)                                          | 67 (23)                          | 1.0 (0.7, 1.4)                                          | 57 (16)                         | 0.8 (0.5, 1.1)                                         |                                         |
| 10-25 (24.5)                                                        | 1,110 (10)        | 27 (9)                           | 0.9 (0.6, 1.3)                                          | 35 (12)                          | 1.3 (0.9, 1.8)                                          | 44 (12)                         | 1.1 (0.8, 1.5)                                         |                                         |
| > 25 (56.0)                                                         | 1,121 (11)        | 35 (12)                          | 1.2 (0.8, 1.8)                                          | 34 (11)                          | 1.2 (0.8, 1.8)                                          | 35 (10)                         | 0.9 (0.6, 1.3)                                         | 0.23                                    |
| Missing                                                             | 313               | 10                               |                                                         | 19                               |                                                         | 9                               |                                                        |                                         |
| Trend (30.0) <sup>h</sup>                                           |                   |                                  | 1.1 (0.9, 1.3)                                          |                                  | 1.1 (0.9, 1.3)                                          |                                 | 0.9 (0.8, 1.1)                                         | 0.47                                    |
| <b>Insecticides</b>                                                 |                   |                                  |                                                         |                                  |                                                         |                                 |                                                        |                                         |
| <b>Carbamates<sup>j</sup></b>                                       |                   |                                  |                                                         |                                  |                                                         |                                 |                                                        |                                         |
| <b>Aldicarb<sup>f, g</sup></b>                                      |                   |                                  |                                                         |                                  |                                                         |                                 |                                                        |                                         |
| 0 (0.0)                                                             | 9,974 (93)        | 272 (92)                         | Reference                                               | 280 (94)                         | Reference                                               | 332 (91)                        | Reference                                              |                                         |
| 1-25 (8.8)                                                          | 425 (4)           | 17 (6)                           | 1.8 (0.8, 3.7)                                          | 15 (5)                           | 1.9 (0.9, 4.1)                                          | 22 (6)                          | 2.2 (1.2, 4.1)                                         |                                         |
| > 25 (108.5)                                                        | 298 (3)           | 6 (2)                            | 1.1 (0.5, 2.7)                                          | 4 (1)                            | <sup>i</sup>                                            | 9 (2)                           | 1.1 (0.5, 2.2)                                         | 0.66                                    |
| Missing                                                             | 293               | 11                               |                                                         | 16                               |                                                         | 8                               |                                                        |                                         |
| Trend (99.8) <sup>h</sup>                                           |                   |                                  | 1.1 (0.5, 2.4)                                          |                                  | 0.5 (0.2, 1.2)                                          |                                 | 1.1 (0.6, 2.0)                                         | 0.32                                    |

| Cumulative lifetime days personally mixed or applied <sup>a,b</sup> | Non-cases [n (%)] | PRE-E <sup>c</sup> Cases [n (%)] | PRE-E <sup>c</sup> IP-weighted OR <sup>d</sup> (95% CI) | PRE-B <sup>c</sup> Cases [n (%)] | PRE-B <sup>c</sup> IP-weighted OR <sup>d</sup> (95% CI) | POST <sup>c</sup> Cases [n (%)] | POST <sup>c</sup> IP-weighted OR <sup>d</sup> (95% CI) | p for difference among ORs <sup>e</sup> |
|---------------------------------------------------------------------|-------------------|----------------------------------|---------------------------------------------------------|----------------------------------|---------------------------------------------------------|---------------------------------|--------------------------------------------------------|-----------------------------------------|
| <b>Carbaryl<sup>f</sup></b>                                         |                   |                                  |                                                         |                                  |                                                         |                                 |                                                        |                                         |
| 0 (0.0)                                                             | 6,033 (57)        | 160 (54)                         | Reference                                               | 154 (52)                         | Reference                                               | 206 (57)                        | Reference                                              |                                         |
| 1-9 (8.8)                                                           | 1,892 (18)        | 58 (20)                          | 1.2 (0.9, 1.7)                                          | 68 (23)                          | 1.4 (1.0, 1.9)                                          | 62 (17)                         | 0.9 (0.7, 1.3)                                         |                                         |
| 10-56 (24.5)                                                        | 1,521 (14)        | 32 (11)                          | 1.0 (0.7, 1.6)                                          | 32 (11)                          | 0.8 (0.5, 1.3)                                          | 50 (14)                         | 0.9 (0.7, 1.3)                                         |                                         |
| > 56 (175.0)                                                        | 1,190 (11)        | 46 (16)                          | 1.7 (1.2, 2.4)                                          | 41 (14)                          | 1.4 (1.0, 2.0)                                          | 44 (12)                         | 1.1 (0.7, 1.5)                                         | 0.36                                    |
| Missing                                                             | 354               | 10                               |                                                         | 20                               |                                                         | 9                               |                                                        |                                         |
| Trend (99.8) <sup>h</sup>                                           |                   |                                  | 1.3 (1.1, 1.6)                                          |                                  | 1.2 (1.0, 1.5)                                          |                                 | 1.1 (0.9, 1.3)                                         | 0.29                                    |
| <b>Carbofuran</b>                                                   |                   |                                  |                                                         |                                  |                                                         |                                 |                                                        |                                         |
| 0 (0.0)                                                             | 12,998 (71)       | 296 (67)                         | Reference                                               | 331 (65)                         | Reference                                               | 468 (73)                        | Reference                                              |                                         |
| 1-9 (8.8)                                                           | 2,245 (12)        | 53 (12)                          | 1.0 (0.8, 1.4)                                          | 77 (15)                          | 1.3 (1.0, 1.7)                                          | 69 (11)                         | 0.9 (0.7, 1.2)                                         |                                         |
| 10-51 (24.5)                                                        | 1,970 (11)        | 57 (13)                          | 1.3 (1.0, 1.7)                                          | 63 (12)                          | 1.3 (1.0, 1.7)                                          | 71 (11)                         | 1.0 (0.8, 1.3)                                         |                                         |
| > 51 (116.0)                                                        | 1,224 (7)         | 39 (9)                           | 1.3 (0.9, 1.9)                                          | 35 (7)                           | 1.1 (0.8, 1.6)                                          | 36 (6)                          | 0.9 (0.6, 1.2)                                         | 0.23                                    |
| Missing                                                             | 1,069             | 29                               |                                                         | 34                               |                                                         | 44                              |                                                        |                                         |
| Trend (47.3) <sup>h</sup>                                           |                   |                                  | 1.1 (1.0, 1.3)                                          |                                  | 1.0 (0.9, 1.2)                                          |                                 | 0.9 (0.8, 1.1)                                         | 0.14                                    |
| <b>Organochlorine insecticides</b>                                  |                   |                                  |                                                         |                                  |                                                         |                                 |                                                        |                                         |
| <b>Aldrin<sup>f</sup></b>                                           |                   |                                  |                                                         |                                  |                                                         |                                 |                                                        |                                         |
| 0 (0.0)                                                             | 8,722 (82)        | 214 (73)                         | Reference                                               | 218 (74)                         | Reference                                               | 293 (81)                        | Reference                                              |                                         |
| 1-9 (8.8)                                                           | 904 (8)           | 31 (11)                          | 1.7 (1.0, 2.8)                                          | 31 (10)                          | 1.5 (0.9, 2.5)                                          | 44 (12)                         | 1.6 (1.1, 2.4)                                         |                                         |
| 10-25 (24.5)                                                        | 576 (5)           | 35 (12)                          | 2.5 (1.7, 3.7)                                          | 27 (9)                           | 1.9 (1.3, 3.0)                                          | 15 (4)                          | 0.7 (0.4, 1.2)                                         |                                         |
| > 25 (56.0)                                                         | 464 (4)           | 15 (5)                           | 1.2 (0.7, 2.1)                                          | 20 (7)                           | 1.7 (1.1, 2.7)                                          | 9 (2)                           | 0.6 (0.3, 1.1)                                         | < 0.01                                  |
| Missing                                                             | 324               | 11                               |                                                         | 19                               |                                                         | 10                              |                                                        |                                         |
| Trend (15.8) <sup>h</sup>                                           |                   |                                  | 1.2 (1.1, 1.3)                                          |                                  | 1.2 (1.1, 1.4)                                          |                                 | 0.9 (0.8, 1.0)                                         | < 0.01                                  |
| <b>Chlordane<sup>f</sup></b>                                        |                   |                                  |                                                         |                                  |                                                         |                                 |                                                        |                                         |
| 0 (0.0)                                                             | 8,480 (80)        | 205 (70)                         | Reference                                               | 224 (76)                         | Reference                                               | 285 (79)                        | Reference                                              |                                         |
| 1-9 (8.8)                                                           | 1,464 (14)        | 58 (20)                          | 2.0 (1.4, 2.8)                                          | 45 (15)                          | 1.1 (0.7, 1.6)                                          | 53 (15)                         | 1.3 (0.9, 1.8)                                         |                                         |
| 10-20 (20.0)                                                        | 189 (2)           | 4 (1)                            | <sup>i</sup>                                            | 6 (2)                            | 1.5 (0.6, 3.4)                                          | 8 (2)                           | 1.1 (0.5, 2.4)                                         |                                         |
| > 20 (50.8)                                                         | 522 (5)           | 27 (9)                           | 2.0 (1.3, 3.0)                                          | 21 (7)                           | 1.7 (1.0, 2.7)                                          | 15 (4)                          | 0.7 (0.4, 1.3)                                         | 0.01                                    |
| Missing                                                             | 335               | 12                               |                                                         | 19                               |                                                         | 10                              |                                                        |                                         |
| Trend (22.0) <sup>h</sup>                                           |                   |                                  | 1.4 (1.2, 1.6)                                          |                                  | 1.3 (1.0, 1.6)                                          |                                 | 0.9 (0.7, 1.1)                                         | 0.01                                    |

| Cumulative lifetime days personally mixed or applied <sup>a,b</sup> | Non-cases [n (%)] | PRE-E <sup>c</sup> Cases [n (%)] | PRE-E <sup>c</sup> IP-weighted OR <sup>d</sup> (95% CI) | PRE-B <sup>c</sup> Cases [n (%)] | PRE-B <sup>c</sup> IP-weighted OR <sup>d</sup> (95% CI) | POST <sup>c</sup> Cases [n (%)] | POST <sup>c</sup> IP-weighted OR <sup>d</sup> (95% CI) | p for difference among ORs <sup>e</sup> |
|---------------------------------------------------------------------|-------------------|----------------------------------|---------------------------------------------------------|----------------------------------|---------------------------------------------------------|---------------------------------|--------------------------------------------------------|-----------------------------------------|
| <b>DDT<sup>f</sup></b>                                              |                   |                                  |                                                         |                                  |                                                         |                                 |                                                        |                                         |
| 0 (Median = 0.0)                                                    | 8,159 (77)        | 205 (70)                         | Reference                                               | 219 (74)                         | Reference                                               | 284 (80)                        | Reference                                              |                                         |
| 1-9 (8.8)                                                           | 1,147 (11)        | 34 (12)                          | 1.1 (0.7, 1.7)                                          | 29 (10)                          | 1.3 (0.8, 2.3)                                          | 34 (10)                         | 1.1 (0.7, 1.9)                                         |                                         |
| 10-39 (24.5)                                                        | 571 (5)           | 21 (7)                           | 1.6 (1.0, 2.5)                                          | 17 (6)                           | 1.1 (0.7, 1.8)                                          | 17 (5)                          | 0.9 (0.6, 1.6)                                         |                                         |
| > 39 (108.5)                                                        | 761 (7)           | 31 (11)                          | 1.7 (1.1, 2.5)                                          | 30 (10)                          | 1.7 (1.1, 2.5)                                          | 23 (6)                          | 0.8 (0.5, 1.3)                                         | 0.19                                    |
| Missing                                                             | 352               | 15                               |                                                         | 20                               |                                                         | 13                              |                                                        |                                         |
| Trend (47.3) <sup>h</sup>                                           |                   |                                  | 1.3 (1.1, 1.5)                                          |                                  | 1.2 (1.0, 1.5)                                          |                                 | 0.9 (0.8, 1.1)                                         | 0.02                                    |
| <b>Dieldrin<sup>f,g</sup></b>                                       |                   |                                  |                                                         |                                  |                                                         |                                 |                                                        |                                         |
| 0 (0.0)                                                             | 10,219 (96)       | 276 (95)                         | Reference                                               | 284 (96)                         | Reference                                               | 350 (96)                        | Reference                                              |                                         |
| 1-9 (8.8)                                                           | 279 (3)           | 9 (3)                            | 1.0 (0.5, 2.0)                                          | 10 (3)                           | 1.2 (0.5, 3.0)                                          | 9 (2)                           | 1.3 (0.5, 3.1)                                         |                                         |
| > 9 (24.5)                                                          | 152 (1)           | 7 (2)                            | 1.5 (0.7, 3.3)                                          | 3 (1)                            | <sup>i</sup>                                            | 5 (1)                           | 1.3 (0.5, 3.4)                                         | 0.70                                    |
| Missing                                                             | 340               | 14                               |                                                         | 18                               |                                                         | 7                               |                                                        |                                         |
| Trend (15.8) <sup>h</sup>                                           |                   |                                  | 1.4 (0.9, 2.1)                                          |                                  | 0.9 (0.5, 1.5)                                          |                                 | 1.1 (0.6, 2.0)                                         | 0.50                                    |
| <b>Heptachlor<sup>f</sup></b>                                       |                   |                                  |                                                         |                                  |                                                         |                                 |                                                        |                                         |
| 0 (0.0)                                                             | 9,283 (87)        | 226 (76)                         | Reference                                               | 253 (84)                         | Reference                                               | 314 (86)                        | Reference                                              |                                         |
| 1-9 (8.8)                                                           | 731 (7)           | 28 (9)                           | 1.6 (0.9, 2.6)                                          | 27 (9)                           | 1.4 (0.8, 2.5)                                          | 25 (7)                          | 1.3 (0.7, 2.1)                                         |                                         |
| 10-25 (24.5)                                                        | 387 (4)           | 23 (8)                           | 2.5 (1.6, 3.9)                                          | 14 (5)                           | 1.3 (0.8, 2.3)                                          | 14 (4)                          | 1.1 (0.6, 1.8)                                         |                                         |
| > 25 (56.0)                                                         | 291 (3)           | 21 (7)                           | 3.1 (1.9, 5.0)                                          | 7 (2)                            | 0.8 (0.4, 1.8)                                          | 11 (3)                          | 1.2 (0.6, 2.2)                                         | 0.01                                    |
| Missing                                                             | 298               | 8                                |                                                         | 14                               |                                                         | 7                               |                                                        |                                         |
| Trend (15.8) <sup>h</sup>                                           |                   |                                  | 1.4 (1.3, 1.6)                                          |                                  | 1.0 (0.9, 1.2)                                          |                                 | 1.1 (0.9, 1.2)                                         | < 0.01                                  |
| <b>Lindane<sup>f</sup></b>                                          |                   |                                  |                                                         |                                  |                                                         |                                 |                                                        |                                         |
| 0 (0.0)                                                             | 9,029 (85)        | 232 (79)                         | Reference                                               | 223 (76)                         | Reference                                               | 287 (80)                        | Reference                                              |                                         |
| 1-9 (8.8)                                                           | 740 (7)           | 19 (6)                           | 1.0 (0.6, 1.7)                                          | 40 (14)                          | 2.0 (1.4, 3.0)                                          | 34 (9)                          | 1.4 (0.9, 2.2)                                         |                                         |
| 10-25 (20.0)                                                        | 340 (3)           | 20 (7)                           | 2.1 (1.3, 3.4)                                          | 7 (2)                            | 0.8 (0.3, 1.7)                                          | 16 (4)                          | 1.6 (0.9, 2.7)                                         |                                         |
| > 25 (103.3)                                                        | 527 (5)           | 24 (8)                           | 1.7 (1.1, 2.6)                                          | 25 (8)                           | 2.0 (1.3, 3.1)                                          | 23 (6)                          | 1.4 (0.9, 2.1)                                         | 0.07                                    |
| Missing                                                             | 354               | 11                               |                                                         | 20                               |                                                         | 11                              |                                                        |                                         |
| Trend (47.3) <sup>h</sup>                                           |                   |                                  | 1.3 (1.1, 1.6)                                          |                                  | 1.4 (1.1, 1.7)                                          |                                 | 1.2 (1.0, 1.4)                                         | 0.54                                    |
| <b>Toxaphene<sup>f</sup></b>                                        |                   |                                  |                                                         |                                  |                                                         |                                 |                                                        |                                         |
| 0 (0.0)                                                             | 9,422 (88)        | 247 (83)                         | Reference                                               | 255 (85)                         | Reference                                               | 318 (87)                        | Reference                                              |                                         |
| 1-9 (8.8)                                                           | 655 (6)           | 26 (9)                           | 1.4 (0.9, 2.2)                                          | 22 (7)                           | 1.2 (0.8, 2.0)                                          | 21 (6)                          | 0.9 (0.6, 1.6)                                         |                                         |

| Cumulative lifetime days personally mixed or applied <sup>a,b</sup> | Non-cases [n (%)] | PRE-E <sup>c</sup> Cases [n (%)] | PRE-E <sup>c</sup> IP-weighted OR <sup>d</sup> (95% CI) | PRE-B <sup>c</sup> Cases [n (%)] | PRE-B <sup>c</sup> IP-weighted OR <sup>d</sup> (95% CI) | POST <sup>c</sup> Cases [n (%)] | POST <sup>c</sup> IP-weighted OR <sup>d</sup> (95% CI) | p for difference among ORs <sup>e</sup> |
|---------------------------------------------------------------------|-------------------|----------------------------------|---------------------------------------------------------|----------------------------------|---------------------------------------------------------|---------------------------------|--------------------------------------------------------|-----------------------------------------|
| 10-25 (24.5)                                                        | 283 (3)           | 12 (4)                           | 1.4 (0.7, 2.5)                                          | 11 (4)                           | 1.5 (0.8, 2.9)                                          | 15 (4)                          | 1.5 (0.9, 2.7)                                         |                                         |
| > 25 (108.5)                                                        | 331 (3)           | 14 (5)                           | 1.5 (0.9, 2.7)                                          | 12 (4)                           | 1.5 (0.8, 2.8)                                          | 11 (3)                          | 0.9 (0.5, 1.7)                                         | 0.76                                    |
| Missing                                                             | 299               | 7                                |                                                         | 15                               |                                                         | 6                               |                                                        |                                         |
| Trend (42.0) <sup>h</sup>                                           |                   |                                  | 1.2 (1.0, 1.5)                                          |                                  | 1.2 (0.9, 1.5)                                          |                                 | 1.0 (0.8, 1.2)                                         | 0.32                                    |
| <i>Organophosphate insecticides</i>                                 |                   |                                  |                                                         |                                  |                                                         |                                 |                                                        |                                         |
| <i>Chlorpyrifos</i>                                                 |                   |                                  |                                                         |                                  |                                                         |                                 |                                                        |                                         |
| 0 (0.0)                                                             | 10,913 (57)       | 252 (54)                         | Reference                                               | 267 (50)                         | Reference                                               | 379 (56)                        | Reference                                              |                                         |
| 1-20 (8.8)                                                          | 3,707 (19)        | 107 (23)                         | 1.3 (1.0, 1.7)                                          | 118 (22)                         | 1.4 (1.1, 1.7)                                          | 132 (20)                        | 1.0 (0.8, 1.3)                                         |                                         |
| 21-56 (38.8)                                                        | 2,850 (15)        | 62 (13)                          | 0.9 (0.7, 1.2)                                          | 94 (18)                          | 1.3 (1.0, 1.7)                                          | 107 (16)                        | 1.1 (0.9, 1.4)                                         |                                         |
| > 56 (116.0)                                                        | 1,785 (9)         | 47 (10)                          | 1.1 (0.8, 1.6)                                          | 54 (10)                          | 1.1 (0.8, 1.5)                                          | 57 (8)                          | 0.9 (0.7, 1.2)                                         | 0.24                                    |
| Missing                                                             | 251               | 6                                |                                                         | 7                                |                                                         | 13                              |                                                        |                                         |
| Trend (47.3) <sup>h</sup>                                           |                   |                                  | 1.0 (0.9, 1.2)                                          |                                  | 1.1 (0.9, 1.2)                                          |                                 | 1.0 (0.9, 1.1)                                         | 0.67                                    |
| <i>Coumaphos</i>                                                    |                   |                                  |                                                         |                                  |                                                         |                                 |                                                        |                                         |
| 0 (0.0)                                                             | 16,483 (90)       | 387 (88)                         | Reference                                               | 437 (88)                         | Reference                                               | 576 (92)                        | Reference                                              |                                         |
| 1-9 (8.8)                                                           | 777 (4)           | 16 (4)                           | 0.8 (0.5, 1.4)                                          | 26 (5)                           | 1.2 (0.8, 1.8)                                          | 27 (4)                          | 0.9 (0.6, 1.3)                                         |                                         |
| 10-39 (24.5)                                                        | 490 (3)           | 18 (4)                           | 1.5 (1.0, 2.5)                                          | 18 (4)                           | 1.4 (0.9, 2.3)                                          | 16 (3)                          | 0.9 (0.5, 1.5)                                         |                                         |
| > 39 (116.0)                                                        | 480 (3)           | 18 (4)                           | 1.5 (0.9, 2.4)                                          | 16 (3)                           | 1.2 (0.7, 2.1)                                          | 8 (1)                           | 0.5 (0.2, 1.0)                                         | 0.10                                    |
| Missing                                                             | 1,276             | 35                               |                                                         | 43                               |                                                         | 61                              |                                                        |                                         |
| Trend (47.3) <sup>h</sup>                                           |                   |                                  | 1.2 (1.0, 1.4)                                          |                                  | 1.1 (0.9, 1.4)                                          |                                 | 0.8 (0.6, 1.0)                                         | 0.02                                    |
| <i>Diazinon<sup>f</sup></i>                                         |                   |                                  |                                                         |                                  |                                                         |                                 |                                                        |                                         |
| 0 (0.0)                                                             | 8,386 (79)        | 229 (78)                         | Reference                                               | 209 (71)                         | Reference                                               | 271 (75)                        | Reference                                              |                                         |
| 1-9 (8.8)                                                           | 1,107 (10)        | 34 (12)                          | 1.2 (0.8, 1.8)                                          | 44 (15)                          | 1.7 (1.2, 2.5)                                          | 43 (12)                         | 1.2 (0.8, 1.7)                                         |                                         |
| 10-25 (24.5)                                                        | 536 (5)           | 13 (4)                           | 0.7 (0.4, 1.3)                                          | 14 (5)                           | 1.0 (0.5, 1.8)                                          | 18 (5)                          | 1.2 (0.7, 1.9)                                         |                                         |
| > 25 (103.3)                                                        | 600 (6)           | 19 (6)                           | 1.2 (0.7, 1.9)                                          | 27 (9)                           | 1.9 (1.2, 2.9)                                          | 29 (8)                          | 1.5 (1.0, 2.2)                                         | 0.42                                    |
| Missing                                                             | 361               | 11                               |                                                         | 21                               |                                                         | 10                              |                                                        |                                         |
| Trend (42.0) <sup>h</sup>                                           |                   |                                  | 1.1 (0.9, 1.3)                                          |                                  | 1.3 (1.1, 1.5)                                          |                                 | 1.2 (1.0, 1.4)                                         | 0.39                                    |
| <i>Dichlorvos</i>                                                   |                   |                                  |                                                         |                                  |                                                         |                                 |                                                        |                                         |
| 0 (0.0)                                                             | 16,229 (88)       | 386 (86)                         | Reference                                               | 410 (82)                         | Reference                                               | 549 (85)                        | Reference                                              |                                         |
| 1-20 (8.8)                                                          | 847 (5)           | 22 (5)                           | 1.3 (0.8, 2.1)                                          | 30 (6)                           | 1.3 (0.8, 1.9)                                          | 36 (6)                          | 1.3 (0.9, 1.9)                                         |                                         |

| Cumulative lifetime days personally mixed or applied <sup>a,b</sup> | Non-cases [n (%)] | PRE-E <sup>c</sup> Cases [n (%)] | PRE-E <sup>c</sup> IP-weighted OR <sup>d</sup> (95% CI) | PRE-B <sup>c</sup> Cases [n (%)] | PRE-B <sup>c</sup> IP-weighted OR <sup>d</sup> (95% CI) | POST <sup>c</sup> Cases [n (%)] | POST <sup>c</sup> IP-weighted OR <sup>d</sup> (95% CI) | p for difference among ORs <sup>e</sup> |
|---------------------------------------------------------------------|-------------------|----------------------------------|---------------------------------------------------------|----------------------------------|---------------------------------------------------------|---------------------------------|--------------------------------------------------------|-----------------------------------------|
| 21-116 (56.0)                                                       | 759 (4)           | 24 (5)                           | 1.3 (0.9, 2.0)                                          | 37 (7)                           | 2.0 (1.4, 2.9)                                          | 32 (5)                          | 1.3 (0.9, 1.8)                                         |                                         |
| > 116 (457.3)                                                       | 634 (3)           | 15 (3)                           | 0.9 (0.6, 1.6)                                          | 24 (5)                           | 1.5 (1.0, 2.2)                                          | 28 (4)                          | 1.3 (0.9, 1.9)                                         | 0.45                                    |
| Missing                                                             | 1,037             | 27                               |                                                         | 39                               |                                                         | 43                              |                                                        |                                         |
| Trend (216.0) <sup>h</sup>                                          |                   |                                  | 1.0 (0.8, 1.2)                                          |                                  | 1.2 (1.0, 1.5)                                          |                                 | 1.1 (0.9, 1.4)                                         | 0.35                                    |
| <b>Fonofos</b>                                                      |                   |                                  |                                                         |                                  |                                                         |                                 |                                                        |                                         |
| 0 (0.0)                                                             | 14,176 (77)       | 319 (71)                         | Reference                                               | 369 (72)                         | Reference                                               | 498 (78)                        | Reference                                              |                                         |
| 1-20 (8.8)                                                          | 1,791 (10)        | 50 (11)                          | 1.2 (0.9, 1.7)                                          | 57 (11)                          | 1.2 (0.9, 1.6)                                          | 54 (8)                          | 0.9 (0.6, 1.2)                                         |                                         |
| 21-51 (24.5)                                                        | 1,206 (7)         | 45 (10)                          | 1.6 (1.1, 2.2)                                          | 39 (8)                           | 1.2 (0.9, 1.7)                                          | 46 (7)                          | 1.0 (0.8, 1.4)                                         |                                         |
| > 51 (116.0)                                                        | 1,321 (7)         | 34 (8)                           | 1.1 (0.8, 1.6)                                          | 46 (9)                           | 1.4 (1.0, 1.9)                                          | 43 (7)                          | 0.9 (0.7, 1.3)                                         | 0.24                                    |
| Missing                                                             | 1,012             | 26                               |                                                         | 29                               |                                                         | 47                              |                                                        |                                         |
| Trend (47.3) <sup>h</sup>                                           |                   |                                  | 1.1 (0.9, 1.2)                                          |                                  | 1.1 (1.0, 1.3)                                          |                                 | 1.0 (0.8, 1.1)                                         | 0.20                                    |
| <b>Malathion<sup>f</sup></b>                                        |                   |                                  |                                                         |                                  |                                                         |                                 |                                                        |                                         |
| 0 (0.0)                                                             | 3,559 (34)        | 77 (26)                          | Reference                                               | 74 (25)                          | Reference                                               | 109 (31)                        | Reference                                              |                                         |
| 1-9 (8.8)                                                           | 2,871 (27)        | 74 (25)                          | 1.1 (0.8, 1.6)                                          | 71 (24)                          | 1.2 (0.8, 1.7)                                          | 102 (29)                        | 1.0 (0.8, 1.4)                                         |                                         |
| 10-39 (24.5)                                                        | 2,253 (21)        | 65 (22)                          | 1.3 (0.9, 1.8)                                          | 79 (27)                          | 1.6 (1.2, 2.3)                                          | 73 (21)                         | 1.0 (0.7, 1.4)                                         |                                         |
| > 39 (108.5)                                                        | 1,939 (18)        | 77 (26)                          | 1.8 (1.3, 2.5)                                          | 72 (24)                          | 1.9 (1.4, 2.7)                                          | 71 (20)                         | 1.2 (0.8, 1.6)                                         | 0.21                                    |
| Missing                                                             | 368               | 13                               |                                                         | 19                               |                                                         | 16                              |                                                        |                                         |
| Trend (47.3) <sup>h</sup>                                           |                   |                                  | 1.3 (1.1, 1.4)                                          |                                  | 1.3 (1.1, 1.4)                                          |                                 | 1.1 (0.9, 1.2)                                         | 0.07                                    |
| <b>Parathion<sup>f</sup></b>                                        |                   |                                  |                                                         |                                  |                                                         |                                 |                                                        |                                         |
| 0 (0.0)                                                             | 9,784 (92)        | 257 (88)                         | Reference                                               | 262 (89)                         | Reference                                               | 336 (93)                        | Reference                                              |                                         |
| 1-9 (8.8)                                                           | 362 (3)           | 16 (6)                           | 1.5 (0.9, 2.8)                                          | 12 (4)                           | 0.8 (0.4, 1.7)                                          | 15 (4)                          | 1.3 (0.7, 2.3)                                         |                                         |
| 10-51 (24.5)                                                        | 229 (2)           | 8 (3)                            | 1.5 (0.6, 3.4)                                          | 8 (3)                            | 1.0 (0.5, 2.1)                                          | 6 (2)                           | 0.6 (0.3, 1.5)                                         |                                         |
| > 51 (116.0)                                                        | 236 (2)           | 10 (3)                           | 1.4 (0.7, 2.8)                                          | 13 (4)                           | 2.3 (1.3, 4.2)                                          | 5 (1)                           | 0.8 (0.3, 1.9)                                         | 0.24                                    |
| Missing                                                             | 379               | 15                               |                                                         | 20                               |                                                         | 9                               |                                                        |                                         |
| Trend (53.8) <sup>h</sup>                                           |                   |                                  | 1.2 (0.9, 1.6)                                          |                                  | 1.5 (1.1, 1.9)                                          |                                 | 0.9 (0.6, 1.4)                                         | 0.13                                    |
| <b>Phorate<sup>f</sup></b>                                          |                   |                                  |                                                         |                                  |                                                         |                                 |                                                        |                                         |
| 0 (0.0)                                                             | 7,258 (68)        | 167 (57)                         | Reference                                               | 189 (64)                         | Reference                                               | 259 (71)                        | Reference                                              |                                         |
| 1-9 (8.8)                                                           | 1,452 (14)        | 42 (14)                          | 1.4 (0.9, 2.0)                                          | 49 (17)                          | 1.1 (0.8, 1.6)                                          | 41 (11)                         | 0.7 (0.5, 1.0)                                         |                                         |
| 10-25 (24.5)                                                        | 961 (9)           | 39 (13)                          | 1.6 (1.1, 2.3)                                          | 33 (11)                          | 1.3 (0.9, 1.8)                                          | 27 (7)                          | 0.7 (0.5, 1.1)                                         |                                         |
| > 25 (62.5)                                                         | 990 (9)           | 44 (15)                          | 1.8 (1.3, 2.6)                                          | 25 (8)                           | 0.9 (0.6, 1.4)                                          | 36 (10)                         | 1.0 (0.7, 1.4)                                         | < 0.01                                  |

| Cumulative lifetime days personally mixed or applied <sup>a,b</sup> | Non-cases [n (%)] | PRE-E <sup>c</sup> Cases [n (%)] | PRE-E <sup>c</sup> IP-weighted OR <sup>d</sup> (95% CI) | PRE-B <sup>c</sup> Cases [n (%)] | PRE-B <sup>c</sup> IP-weighted OR <sup>d</sup> (95% CI) | POST <sup>c</sup> Cases [n (%)] | POST <sup>c</sup> IP-weighted OR <sup>d</sup> (95% CI) | p for difference among ORs <sup>e</sup> |
|---------------------------------------------------------------------|-------------------|----------------------------------|---------------------------------------------------------|----------------------------------|---------------------------------------------------------|---------------------------------|--------------------------------------------------------|-----------------------------------------|
| Missing                                                             | 329               | 14                               |                                                         | 19                               |                                                         | 8                               |                                                        |                                         |
| Trend (47.3) <sup>h</sup>                                           |                   |                                  | 1.6 (1.2, 2.0)                                          |                                  | 1.0 (0.7, 1.4)                                          |                                 | 0.9 (0.7, 1.2)                                         | 0.01                                    |
| <b>Terbufos</b>                                                     |                   |                                  |                                                         |                                  |                                                         |                                 |                                                        |                                         |
| 0 (0.0)                                                             | 10,867 (59)       | 227 (51)                         | Reference                                               | 274 (54)                         | Reference                                               | 385 (60)                        | Reference                                              |                                         |
| 1-20 (8.8)                                                          | 2,755 (15)        | 73 (16)                          | 1.3 (1.0, 1.7)                                          | 89 (18)                          | 1.2 (0.9, 1.6)                                          | 92 (14)                         | 1.0 (0.8, 1.2)                                         |                                         |
| 21-56 (38.8)                                                        | 2,639 (14)        | 75 (17)                          | 1.4 (1.0, 1.8)                                          | 77 (15)                          | 1.1 (0.9, 1.5)                                          | 97 (15)                         | 1.0 (0.8, 1.3)                                         |                                         |
| > 56 (116.0)                                                        | 2,208 (12)        | 71 (16)                          | 1.5 (1.1, 1.9)                                          | 65 (13)                          | 1.2 (0.9, 1.6)                                          | 69 (11)                         | 0.9 (0.7, 1.2)                                         | 0.19                                    |
| Missing                                                             | 1,037             | 28                               |                                                         | 35                               |                                                         | 45                              |                                                        |                                         |
| Trend (88.5) <sup>h</sup>                                           |                   |                                  | 1.3 (1.1, 1.6)                                          |                                  | 1.1 (0.9, 1.4)                                          |                                 | 0.9 (0.8, 1.2)                                         | 0.07                                    |
| <b>Pyrethroid insecticides</b>                                      |                   |                                  |                                                         |                                  |                                                         |                                 |                                                        |                                         |
| <b>Permethrin (for animals)</b>                                     |                   |                                  |                                                         |                                  |                                                         |                                 |                                                        |                                         |
| 0 (0.0)                                                             | 15,726 (85)       | 372 (83)                         | Reference                                               | 420 (83)                         | Reference                                               | 546 (84)                        | Reference                                              |                                         |
| 1-9 (8.8)                                                           | 1,195 (6)         | 25 (6)                           | 0.9 (0.6, 1.4)                                          | 37 (7)                           | 1.0 (0.7, 1.5)                                          | 37 (6)                          | 1.0 (0.7, 1.5)                                         |                                         |
| 10-51 (24.5)                                                        | 868 (5)           | 18 (4)                           | 0.8 (0.5, 1.4)                                          | 29 (6)                           | 1.3 (0.9, 1.9)                                          | 30 (5)                          | 1.0 (0.7, 1.4)                                         |                                         |
| > 51 (116.0)                                                        | 737 (4)           | 33 (7)                           | 1.8 (1.2, 2.6)                                          | 21 (4)                           | 1.0 (0.7, 1.6)                                          | 34 (5)                          | 1.4 (1.0, 1.9)                                         | 0.43                                    |
| Missing                                                             | 980               | 26                               |                                                         | 33                               |                                                         | 41                              |                                                        |                                         |
| Trend (47.3) <sup>h</sup>                                           |                   |                                  | 1.3 (1.1, 1.5)                                          |                                  | 1.0 (0.9, 1.2)                                          |                                 | 1.1 (1.0, 1.3)                                         | 0.26                                    |
| <b>Permethrin (for crops)</b>                                       |                   |                                  |                                                         |                                  |                                                         |                                 |                                                        |                                         |
| 0 (0.0)                                                             | 15,902 (87)       | 377 (85)                         | Reference                                               | 415 (84)                         | Reference                                               | 560 (88)                        | Reference                                              |                                         |
| 1-9 (8.8)                                                           | 1,294 (7)         | 37 (8)                           | 1.3 (0.9, 1.8)                                          | 48 (10)                          | 1.5 (1.1, 2.1)                                          | 46 (7)                          | 1.0 (0.7, 1.4)                                         |                                         |
| 10-30 (24.5)                                                        | 481 (3)           | 14 (3)                           | 1.3 (0.8, 2.4)                                          | 15 (3)                           | 1.1 (0.7, 2.0)                                          | 5 (1)                           | 0.3 (0.1, 0.7)                                         |                                         |
| > 30 (108.5)                                                        | 685 (4)           | 15 (3)                           | 0.9 (0.5, 1.6)                                          | 15 (3)                           | 0.9 (0.5, 1.5)                                          | 27 (4)                          | 1.2 (0.8, 1.8)                                         | 0.04                                    |
| Missing                                                             | 1,144             | 31                               |                                                         | 47                               |                                                         | 50                              |                                                        |                                         |
| Trend (47.3) <sup>h</sup>                                           |                   |                                  | 1.0 (0.8, 1.2)                                          |                                  | 1.0 (0.8, 1.2)                                          |                                 | 1.0 (0.9, 1.3)                                         | 0.88                                    |

Abbreviations: 2,4-D, (2,4-dichlorophenoxy)acetic acid; 2,4,5-T, (2,4,5-trichlorophenoxy)acetic acid; 2,4,5-TP, (*RS*)-2-(2,4,5-trichlorophenoxy)propionic acid; CI, confidence interval; DDT, 1,1,1-trichloro-2,2-bis(4-chlorophenyl)ethane; EPTC, *S*-ethyl dipropyl(thiocarbamate); IQR, interquartile range; IP, inverse probability; OR, odds ratio; POST, post-enrollment; PRE-B, pre-enrollment both; PRE-E, pre-enrollment enrollment only.

<sup>a</sup>Category boundaries set at tertiles of cumulative lifetime days of use for each pesticide among all male private pesticide applicators who used it. <sup>b</sup>Fewer than five PRE-E, PRE-B, or POST cases used trichlorfon or ziram at every exposure level. <sup>c</sup>See footnote a at the bottom of Table S1 for a description of the three case groups. <sup>d</sup>Weights adjusted for age at enrollment (modeled with a restricted, quadratic spline with knots at ages 40, 48, and 57 years based on percentiles of the age distribution in cases), ever diagnosed with diabetes, education level, state of residence, not missing covariate data (conditional on age, state, the exposure, and pairwise interaction terms between each covariate and the exposure), and not dropping out of the AHS cohort (conditional on age, diabetes, education, state, the exposure, and pairwise interaction terms between each covariate and the exposure). 95% CIs calculated with robust variance estimates. <sup>e</sup>Differences among case-group-specific ORs tested via Wald  $\chi^2$  tests. <sup>f</sup>Data available only for 11,982 applicators who completed the farmer questionnaire. Weights additionally adjusted for completing the farmer questionnaire (conditional on age, diabetes, education, and state). <sup>g</sup>Category boundaries set at the median of cumulative lifetime days of use for each pesticide among all male private pesticide applicators who used it. <sup>h</sup>Used within-category medians and scaled the OR to an IQR-unit (days) increase in cumulative lifetime days of use for each pesticide among all male private pesticide applicators who used it. <sup>i</sup>OR (95% CI) not shown because fewer than five PRE-E or PRE-B cases used aldicarb, captan, carbon tetrachloride/carbon disulfide (80/20 mix), chlordane, dieldrin, ethylene dibromide, maneb/mancozeb, or paraquat at this exposure level. <sup>j</sup>Benomyl is also included in carbamates.

**Table S6.** Pesticide use and self-reported depression among male private pesticide applicators in the Agricultural Health Study without weighting for potential biases from missing covariate data, missing farmer questionnaire, or drop out.

| <b>Variable</b>                                                                         | <b>PRE-E<sup>a</sup><br/>Adjusted OR<sup>b</sup><br/>(95% CI)</b> | <b>PRE-B<sup>a</sup><br/>Adjusted<br/>OR<sup>b</sup> (95% CI)</b> | <b>POST<sup>a</sup><br/>Adjusted<br/>OR<sup>b</sup> (95% CI)</b> | <b>p for<br/>Difference<br/>among ORs<sup>c</sup></b> |
|-----------------------------------------------------------------------------------------|-------------------------------------------------------------------|-------------------------------------------------------------------|------------------------------------------------------------------|-------------------------------------------------------|
| Cumulative days personally mixed or applied pesticides <sup>d</sup>                     |                                                                   |                                                                   |                                                                  |                                                       |
| ≤ 56 (Median = 24.5)                                                                    | Reference                                                         | Reference                                                         | Reference                                                        |                                                       |
| 57-225 (116.0)                                                                          | 1.3 (1.0, 1.7)                                                    | 1.1 (0.9, 1.4)                                                    | 0.9 (0.7, 1.1)                                                   |                                                       |
| 226-457 (369.8)                                                                         | 1.4 (1.0, 1.8)                                                    | 1.2 (0.9, 1.6)                                                    | 1.1 (0.9, 1.4)                                                   |                                                       |
| > 457 (767.3)                                                                           | 1.5 (1.1, 2.0)                                                    | 1.1 (0.8, 1.5)                                                    | 1.0 (0.8, 1.2)                                                   | 0.29                                                  |
| Missing                                                                                 |                                                                   |                                                                   |                                                                  |                                                       |
| Trend (IQR = 401.3) <sup>e</sup>                                                        | 1.2 (1.0, 1.3)                                                    | 1.0 (0.9, 1.2)                                                    | 1.0 (0.9, 1.2)                                                   | 0.26                                                  |
| Ever diagnosed with pesticide poisoning <sup>f</sup>                                    |                                                                   |                                                                   |                                                                  |                                                       |
| No                                                                                      | Reference                                                         | Reference                                                         | Reference                                                        |                                                       |
| Yes                                                                                     | 5.1 (3.4, 7.7)                                                    | 2.7 (1.6, 4.5)                                                    | 1.0 (0.5, 2.2)                                                   | < 0.01                                                |
| Missing                                                                                 |                                                                   |                                                                   |                                                                  |                                                       |
| Ever experienced an incident of unusually high personal pesticide exposure <sup>f</sup> |                                                                   |                                                                   |                                                                  |                                                       |
| No                                                                                      | Reference                                                         | Reference                                                         | Reference                                                        |                                                       |
| Yes                                                                                     | 2.3 (1.8, 3.0)                                                    | 2.2 (1.7, 2.8)                                                    | 1.1 (0.8, 1.4)                                                   | < 0.01                                                |
| Missing                                                                                 |                                                                   |                                                                   |                                                                  |                                                       |

Abbreviations: CI, confidence interval; IQR, interquartile range; OR, odds ratio; POST, post-enrollment; PRE-B, pre-enrollment both; PRE-E, pre-enrollment enrollment only.

<sup>a</sup>See footnote a at the bottom of Table S1 for a description of the three case groups. <sup>b</sup>Adjusted for age at enrollment (modeled with a cubic polynomial), ever diagnosed with diabetes, education level, and state of residence. <sup>c</sup>Differences among case-group-specific ORs tested via Wald  $\chi^2$  tests. <sup>d</sup>Category boundaries set at quartiles of cumulative days of pesticide use among all male private pesticide applicators. <sup>e</sup>Used within-category medians and scaled the OR to an IQR-unit (days) increase in cumulative days of pesticide use among all male private pesticide applicators. <sup>f</sup>Data available only for 11,982 applicators who completed the farmer questionnaire.



**Table S7.** Ever-use of pesticide classes and specific pesticides and self-reported depression among male private pesticide applicators in the Agricultural Health Study without weighting for potential biases from missing covariate data, missing farmer questionnaire, or drop out.

| <b>Ever personally mixed or applied</b>               | <b>PRE-E<sup>a</sup><br/>Adjusted OR<sup>b,c</sup><br/>(95% CI)</b> | <b>PRE-B<sup>a</sup><br/>Adjusted OR<sup>b,c</sup><br/>(95% CI)</b> | <b>POST<sup>a</sup><br/>Adjusted OR<sup>b,c</sup><br/>(95% CI)</b> | <b>p for<br/>Difference<br/>among ORs<sup>d</sup></b> |
|-------------------------------------------------------|---------------------------------------------------------------------|---------------------------------------------------------------------|--------------------------------------------------------------------|-------------------------------------------------------|
| <b><i>Fumigants</i></b>                               | 1.3 (1.1, 1.7)                                                      | 1.7 (1.4, 2.1)                                                      | 1.2 (1.0, 1.5)                                                     | 0.04                                                  |
| Aluminum phosphide                                    | 1.5 (1.0, 2.1)                                                      | 1.5 (1.1, 2.1)                                                      | 1.5 (1.1, 2.0)                                                     | 1.00                                                  |
| Carbon tetrachloride/<br>carbon disulfide (80/20 mix) | 1.5 (1.1, 2.0)                                                      | 1.6 (1.2, 2.2)                                                      | 1.2 (0.9, 1.7)                                                     | 0.40                                                  |
| Ethylene dibromide                                    | 1.5 (1.0, 2.2)                                                      | 1.4 (0.9, 2.1)                                                      | 1.2 (0.8, 1.8)                                                     | 0.83                                                  |
| Methyl bromide                                        | 1.2 (0.9, 1.6)                                                      | 1.4 (1.0, 1.8)                                                      | 1.0 (0.8, 1.3)                                                     | 0.31                                                  |
| <b><i>Fungicides</i></b>                              | 1.2 (1.0, 1.5)                                                      | 1.4 (1.1, 1.7)                                                      | 1.1 (0.9, 1.3)                                                     | 0.24                                                  |
| Benomyl <sup>e</sup>                                  | 1.1 (0.8, 1.6)                                                      | 1.0 (0.7, 1.4)                                                      | 1.1 (0.8, 1.4)                                                     | 0.82                                                  |
| Captan                                                | 1.1 (0.9, 1.5)                                                      | 1.4 (1.1, 1.8)                                                      | 1.1 (0.9, 1.4)                                                     | 0.29                                                  |
| Chlorothalonil                                        | 1.0 (0.7, 1.5)                                                      | 1.4 (1.0, 1.9)                                                      | 1.1 (0.8, 1.5)                                                     | 0.49                                                  |
| Maneb/mancozeb                                        | 1.2 (0.9, 1.7)                                                      | 1.1 (0.8, 1.5)                                                      | 1.0 (0.8, 1.3)                                                     | 0.70                                                  |
| Metalaxyl                                             | 1.4 (1.1, 1.8)                                                      | 1.2 (1.0, 1.5)                                                      | 1.0 (0.8, 1.2)                                                     | 0.09                                                  |
| Ziram                                                 | 1.5 (0.8, 2.9)                                                      | 0.7 (0.3, 1.6)                                                      | 1.2 (0.7, 2.2)                                                     | 0.32                                                  |
| <b><i>Herbicides</i></b>                              | 1.7 (0.7, 4.2)                                                      | 1.3 (0.6, 2.8)                                                      | 1.4 (0.7, 2.6)                                                     | 0.90                                                  |
| Alachlor                                              | 1.2 (1.0, 1.5)                                                      | 1.2 (1.0, 1.4)                                                      | 1.1 (1.0, 1.3)                                                     | 0.81                                                  |
| Butylate                                              | 1.0 (0.8, 1.2)                                                      | 1.1 (0.9, 1.3)                                                      | 1.1 (0.9, 1.3)                                                     | 0.72                                                  |
| Chlorimuron-ethyl                                     | 1.0 (0.8, 1.2)                                                      | 1.1 (0.9, 1.3)                                                      | 1.1 (0.9, 1.3)                                                     | 0.63                                                  |
| Dicamba                                               | 0.9 (0.7, 1.1)                                                      | 1.0 (0.8, 1.3)                                                      | 1.1 (0.9, 1.3)                                                     | 0.47                                                  |
| EPTC                                                  | 1.2 (1.0, 1.5)                                                      | 0.9 (0.7, 1.1)                                                      | 1.2 (1.0, 1.4)                                                     | 0.13                                                  |
| Glyphosate                                            | 1.2 (1.0, 1.5)                                                      | 1.1 (0.9, 1.4)                                                      | 1.1 (0.9, 1.3)                                                     | 0.72                                                  |
| Imazethapyr                                           | 1.1 (0.9, 1.3)                                                      | 0.9 (0.7, 1.0)                                                      | 1.1 (0.9, 1.3)                                                     | 0.21                                                  |
| Metolachlor                                           | 1.1 (0.9, 1.3)                                                      | 0.8 (0.7, 1.0)                                                      | 1.0 (0.8, 1.1)                                                     | 0.14                                                  |
| Paraquat                                              | 1.2 (0.9, 1.5)                                                      | 1.1 (0.9, 1.4)                                                      | 1.0 (0.8, 1.2)                                                     | 0.67                                                  |
| Pendimethalin                                         | 1.2 (1.0, 1.4)                                                      | 0.9 (0.8, 1.1)                                                      | 0.9 (0.8, 1.1)                                                     | 0.10                                                  |
| Petroleum oil                                         | 1.3 (1.1, 1.6)                                                      | 1.2 (1.0, 1.5)                                                      | 1.0 (0.9, 1.2)                                                     | 0.18                                                  |
| Trifluralin                                           | 1.2 (1.0, 1.4)                                                      | 1.1 (0.9, 1.3)                                                      | 1.1 (0.9, 1.3)                                                     | 0.73                                                  |
| <b><i>Phenoxy herbicides</i></b>                      | 1.1 (0.8, 1.4)                                                      | 1.2 (0.9, 1.6)                                                      | 0.9 (0.8, 1.1)                                                     | 0.24                                                  |
| 2,4-D                                                 | 1.0 (0.8, 1.3)                                                      | 1.1 (0.9, 1.4)                                                      | 0.9 (0.8, 1.1)                                                     | 0.57                                                  |
| 2,4,5-T                                               | 1.4 (1.2, 1.8)                                                      | 1.5 (1.2, 1.8)                                                      | 1.1 (0.9, 1.4)                                                     | 0.09                                                  |
| 2,4,5-TP                                              | 1.5 (1.1, 1.9)                                                      | 1.4 (1.1, 1.8)                                                      | 1.1 (0.8, 1.4)                                                     | 0.26                                                  |
| <b><i>Triazine herbicides</i></b>                     | 1.1 (0.8, 1.4)                                                      | 1.0 (0.8, 1.2)                                                      | 1.0 (0.8, 1.3)                                                     | 0.82                                                  |
| Atrazine                                              | 1.2 (0.9, 1.5)                                                      | 1.0 (0.8, 1.3)                                                      | 1.0 (0.8, 1.2)                                                     | 0.54                                                  |
| Cyanazine                                             | 1.3 (1.0, 1.6)                                                      | 1.1 (0.9, 1.4)                                                      | 1.1 (0.9, 1.3)                                                     | 0.63                                                  |
| Metribuzin                                            | 1.1 (0.9, 1.3)                                                      | 1.0 (0.9, 1.3)                                                      | 1.0 (0.9, 1.2)                                                     | 0.91                                                  |

| Ever personally mixed or applied           | PRE-E <sup>a</sup><br>Adjusted OR <sup>b,c</sup><br>(95% CI) | PRE-B <sup>a</sup><br>Adjusted OR <sup>b,c</sup><br>(95% CI) | POST <sup>a</sup><br>Adjusted OR <sup>b,c</sup><br>(95% CI) | <i>p</i> for<br>Difference<br>among ORs <sup>d</sup> |
|--------------------------------------------|--------------------------------------------------------------|--------------------------------------------------------------|-------------------------------------------------------------|------------------------------------------------------|
| <b><i>Insecticides</i></b>                 | 1.4 (0.8, 2.4)                                               | 0.9 (0.6, 1.4)                                               | 1.5 (1.0, 2.4)                                              | 0.20                                                 |
| <b><i>Carbamates<sup>e</sup></i></b>       | 1.1 (0.9, 1.3)                                               | 1.2 (1.0, 1.5)                                               | 1.1 (0.9, 1.4)                                              | 0.68                                                 |
| Aldicarb                                   | 0.9 (0.7, 1.3)                                               | 1.1 (0.8, 1.5)                                               | 1.2 (0.9, 1.6)                                              | 0.45                                                 |
| Carbaryl                                   | 1.2 (1.0, 1.5)                                               | 1.3 (1.1, 1.6)                                               | 1.2 (1.0, 1.4)                                              | 0.75                                                 |
| Carbofuran                                 | 1.1 (0.9, 1.3)                                               | 1.2 (1.0, 1.4)                                               | 0.9 (0.8, 1.1)                                              | 0.16                                                 |
| <b><i>Organochlorine insecticides</i></b>  | 1.9 (1.5, 2.3)                                               | 1.2 (1.0, 1.5)                                               | 1.2 (1.0, 1.5)                                              | 0.01                                                 |
| Aldrin                                     | 1.4 (1.1, 1.7)                                               | 1.5 (1.2, 1.8)                                               | 1.2 (1.0, 1.5)                                              | 0.40                                                 |
| Chlordane                                  | 1.5 (1.3, 1.9)                                               | 1.2 (1.0, 1.5)                                               | 1.1 (0.9, 1.3)                                              | 0.05                                                 |
| DDT                                        | 1.3 (1.1, 1.7)                                               | 1.2 (0.9, 1.4)                                               | 0.9 (0.7, 1.1)                                              | 0.03                                                 |
| Dieldrin                                   | 1.4 (1.0, 1.9)                                               | 1.3 (1.0, 1.8)                                               | 1.1 (0.8, 1.5)                                              | 0.60                                                 |
| Heptachlor                                 | 1.6 (1.3, 2.0)                                               | 1.3 (1.0, 1.6)                                               | 1.0 (0.8, 1.2)                                              | 0.01                                                 |
| Lindane                                    | 1.6 (1.3, 1.9)                                               | 1.3 (1.0, 1.5)                                               | 1.1 (0.9, 1.4)                                              | 0.05                                                 |
| Toxaphene                                  | 1.3 (1.0, 1.6)                                               | 1.4 (1.1, 1.7)                                               | 1.1 (0.9, 1.4)                                              | 0.49                                                 |
| <b><i>Organophosphate insecticides</i></b> | 1.5 (1.0, 2.1)                                               | 1.1 (0.8, 1.5)                                               | 1.3 (1.0, 1.8)                                              | 0.51                                                 |
| Chlorpyrifos                               | 1.2 (1.0, 1.4)                                               | 1.3 (1.1, 1.6)                                               | 1.0 (0.9, 1.2)                                              | 0.07                                                 |
| Coumaphos                                  | 1.3 (1.0, 1.7)                                               | 1.3 (1.0, 1.6)                                               | 0.9 (0.7, 1.1)                                              | 0.08                                                 |
| Diazinon                                   | 1.3 (1.1, 1.6)                                               | 1.4 (1.1, 1.6)                                               | 1.1 (1.0, 1.4)                                              | 0.39                                                 |
| Dichlorvos                                 | 1.0 (0.8, 1.4)                                               | 1.5 (1.2, 1.9)                                               | 1.3 (1.1, 1.6)                                              | 0.10                                                 |
| Fonofos                                    | 1.3 (1.0, 1.6)                                               | 1.2 (0.9, 1.4)                                               | 1.0 (0.8, 1.2)                                              | 0.17                                                 |
| Malathion                                  | 1.4 (1.1, 1.7)                                               | 1.2 (1.0, 1.5)                                               | 1.2 (1.0, 1.4)                                              | 0.56                                                 |
| Parathion                                  | 1.5 (1.2, 1.9)                                               | 1.2 (0.9, 1.5)                                               | 1.2 (1.0, 1.5)                                              | 0.30                                                 |
| Phorate                                    | 1.3 (1.0, 1.6)                                               | 1.0 (0.9, 1.3)                                               | 1.0 (0.9, 1.2)                                              | 0.22                                                 |
| Terbufos                                   | 1.4 (1.1, 1.7)                                               | 1.2 (1.0, 1.4)                                               | 1.0 (0.8, 1.2)                                              | 0.02                                                 |
| Trichlorfon                                | 1.7 (0.7, 4.1)                                               | f                                                            | f                                                           | f                                                    |
| <b><i>Pyrethroid insecticides</i></b>      | 1.2 (1.0, 1.5)                                               | 1.2 (1.0, 1.4)                                               | 0.9 (0.8, 1.1)                                              | 0.09                                                 |
| Permethrin (for animals)                   | 1.2 (1.0, 1.6)                                               | 1.1 (0.9, 1.4)                                               | 1.0 (0.8, 1.3)                                              | 0.48                                                 |
| Permethrin (for crops)                     | 1.2 (0.9, 1.6)                                               | 1.3 (1.0, 1.7)                                               | 0.9 (0.7, 1.1)                                              | 0.04                                                 |

Abbreviations: 2,4-D, (2,4-dichlorophenoxy)acetic acid; 2,4,5-T, (2,4,5-trichlorophenoxy)acetic acid; 2,4,5-TP, (*RS*)-2-(2,4,5-trichlorophenoxy)propionic acid; CI, confidence interval; DDT, 1,1,1-trichloro-2,2-bis(4-chlorophenyl)ethane; EPTC, *S*-ethyl dipropyl(thiocarbamate); OR, odds ratio; POST, post-enrollment; PRE-B, pre-enrollment both; PRE-E, pre-enrollment enrollment only.

<sup>a</sup>See footnote a at the bottom of Table S1 for a description of the three case groups. <sup>b</sup>Male private pesticide applicators who did not use each pesticide class or specific pesticide were the reference.

<sup>c</sup>Adjusted for age at enrollment (modeled with a cubic polynomial), ever diagnosed with diabetes,

education level, and state of residence. <sup>d</sup>Differences among case-group-specific ORs tested via Wald  $\chi^2$

tests. <sup>e</sup>Benomyl is also included in carbamates. <sup>f</sup>OR (95% CI) and *p* for difference not shown because fewer than five PRE-B or POST cases ever personally mixed or applied trichlorfon.

## References

- Cole SR, Hernán MA. 2008. Constructing inverse probability weights for marginal structural models. *Am J Epidemiol* 168:656-664.
- Hernán MA, Brumback B, Robins JM. 2000. Marginal structural models to estimate the causal effect of zidovudine on the survival of HIV-positive men. *Epidemiology* 11:561-570.
- Hernán MA, Hernández-Díaz S, Robins JM. 2004. A structural approach to selection bias. *Epidemiology* 15:615-625.
- Hernán MA, Robins JM. 2006. Estimating causal effects from epidemiological data. *J Epidemiol Community Health* 60:578-586.
- Muller KE, Fetterman BA. 2002. *Regression and ANOVA: An Integrated Approach Using SAS Software*. Cary, NC:SAS Institute Inc.
- Robins JM. 1998. Marginal structural models. In: 1997 Proceedings of the American Statistical Association, Section on Bayesian Statistical Science. Alexandria, VA:American Statistical Association, 1–10.
- Robins JM, Hernán MA, Brumback B. 2000. Marginal structural models and causal inference in epidemiology. *Epidemiology* 11:550-560.
- Sato T, Matsuyama Y. 2003. Marginal structural models as a tool for standardization. *Epidemiology* 14:680–686.
- Stokes, ME, Davis CS, Koch GG. 2000. *Categorical Data Analysis Using the SAS System*. 2nd ed. Cary, NC:SAS Institute Inc.
